# Supplementary material for: The structural repertoire of Fusarium oxysporum f. sp. lycopersici effectors revealed by experimental and computational studies
Source: eLife journal article supplement (doi:10.7554/elife.89280), 2023-07-18
Supplement: fig2-figsupp3-data1 [file elife-89280-fig2-figsupp3-data1-v1.pdf]

|                                  |  | FOLD effectors   |                     |                    |                    |
|----------------------------------|--|------------------|---------------------|--------------------|--------------------|
|                                  |  | Avr1             | Avr3                | SIX6               | SIX13              |
| <i>Fusarium oxysporum</i> f. sp. |  |                  | <i>psi</i>          |                    |                    |
|                                  |  |                  | <i>melonis</i>      |                    |                    |
|                                  |  |                  | <i>cubense</i> TR4  |                    |                    |
|                                  |  |                  |                     | <i>vasinfectum</i> |                    |
|                                  |  | <i>niveum</i>    |                     | <i>niveum</i>      |                    |
|                                  |  |                  |                     | <i>passiflorae</i> |                    |
|                                  |  |                  | <i>fragariae</i>    |                    | <i>fragariae</i>   |
|                                  |  |                  | <i>conglutinans</i> |                    |                    |
|                                  |  |                  |                     |                    | <i>medicaginis</i> |
|                                  |  | <i>spinaciae</i> |                     |                    |                    |
