# Supplementary material for: The structural repertoire of Fusarium oxysporum f. sp. lycopersici effectors revealed by experimental and computational studies
Source: eLife journal article supplement (doi:10.7554/elife.89280), 2023-07-18

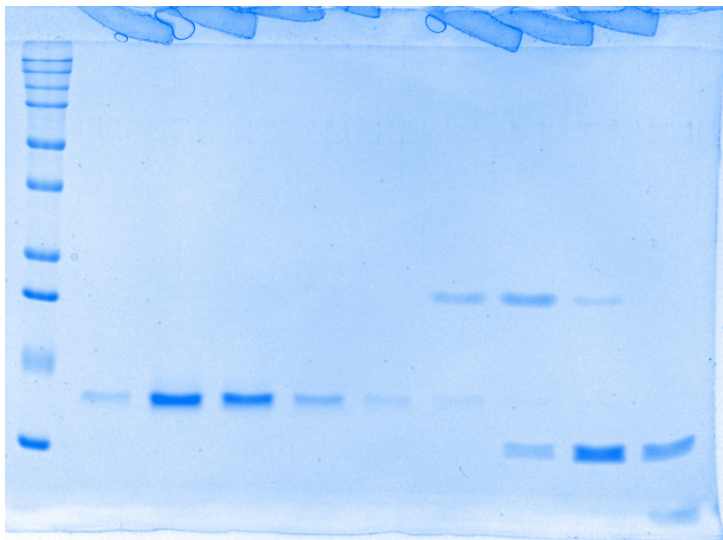

Supplement: fig4-figsupp1-data3 [file elife-89280-fig4-figsupp1-data3-v1.pdf]
