# Supplementary material for: The structural repertoire of Fusarium oxysporum f. sp. lycopersici effectors revealed by experimental and computational studies
Source: eLife journal article supplement (doi:10.7554/elife.89280), 2023-07-18
Supplement: fig5-data2 [file Figure 5—source data 2.xlsx]

## Sheet: Sheet1
Protein	Conductivity		Abbreviations
Avr1	5.2		ANFC : Avr1N FonSIX4C
Avr1	5.2		FNAC : FonSIX4N Avr1C
Avr1	4.6		EV : Empty Vector
Avr1	3.5
Avr1	5.5
Avr1	6.1
FonSIX4	9.6
FonSIX4	10.3
FonSIX4	11.1
FonSIX4	8.5
FonSIX4	13.5
FonSIX4	15.1
ANFC	9.7
ANFC	12.1
ANFC	12.8
ANFC	10.2
ANFC	11.5
ANFC	11.4
FNAC	4.7
FNAC	5.5
FNAC	4.6
FNAC	3.6
FNAC	5.7
FNAC	3.8
Avr1-N	4
Avr1-N	4.4
Avr1-N	2.6
Avr1-N	2.9
Avr1-N	4.8
Avr1-N	3.1
Avr1-C	4.1
Avr1-C	2.8
Avr1-C	5.8
Avr1-C	2.9
Avr1-C	3.1
Avr1-C	4.5
FonSIX4-N	3.4
FonSIX4-N	3.6
FonSIX4-N	5.7
FonSIX4-N	2.8
FonSIX4-N	5.8
FonSIX4-N	3.2
FonSIX4-C	7.2
FonSIX4-C	11.4
FonSIX4-C	8.5
FonSIX4-C	7.6
FonSIX4-C	10.3
FonSIX4-C	13.9
EV	3.6
EV	4.9
EV	5.2
EV	3.5
EV	2.8
EV	2.9
