# Supplementary material for: The structural repertoire of Fusarium oxysporum f. sp. lycopersici effectors revealed by experimental and computational studies
Source: eLife journal article supplement (doi:10.7554/elife.89280), 2023-07-18
Supplement: fig5-data3 [file Figure 5—source data 3.xlsx]

## Sheet: Sheet1
Protein	Conductivity
Avr1	5
Avr1	3.9
Avr1	4.2
Avr1	5.4
Avr1	5.4
Avr1	4.3
Avr1_ADVKT	6.8
Avr1_ADVKT	5
Avr1_ADVKT	6.3
Avr1_ADVKT	5.4
Avr1_ADVKT	6.1
Avr1_ADVKT	7.5
Avr1_IDH	4.6
Avr1_IDH	4.3
Avr1_IDH	4.1
Avr1_IDH	5.9
Avr1_IDH	4.2
Avr1_IDH	5.1
Avr1_NGQAR	8.5
Avr1_NGQAR	5.4
Avr1_NGQAR	6.3
Avr1_NGQAR	6
Avr1_NGQAR	6.1
Avr1_NGQAR	6.8
Avr1_EEEYGIN	10.5
Avr1_EEEYGIN	8.1
Avr1_EEEYGIN	10.4
Avr1_EEEYGIN	7.7
Avr1_EEEYGIN	7.4
Avr1_EEEYGIN	9.7
FonSIX4	10.5
FonSIX4	9.7
FonSIX4	13.5
FonSIX4	9.1
FonSIX4	8.7
FonSIX4	10.2
EV	4.4
EV	3.1
EV	3.6
EV	3.8
EV	2.6
EV	3.2
