# Supplementary material for: The structural repertoire of Fusarium oxysporum f. sp. lycopersici effectors revealed by experimental and computational studies
Source: eLife journal article supplement (doi:10.7554/elife.89280), 2023-07-18

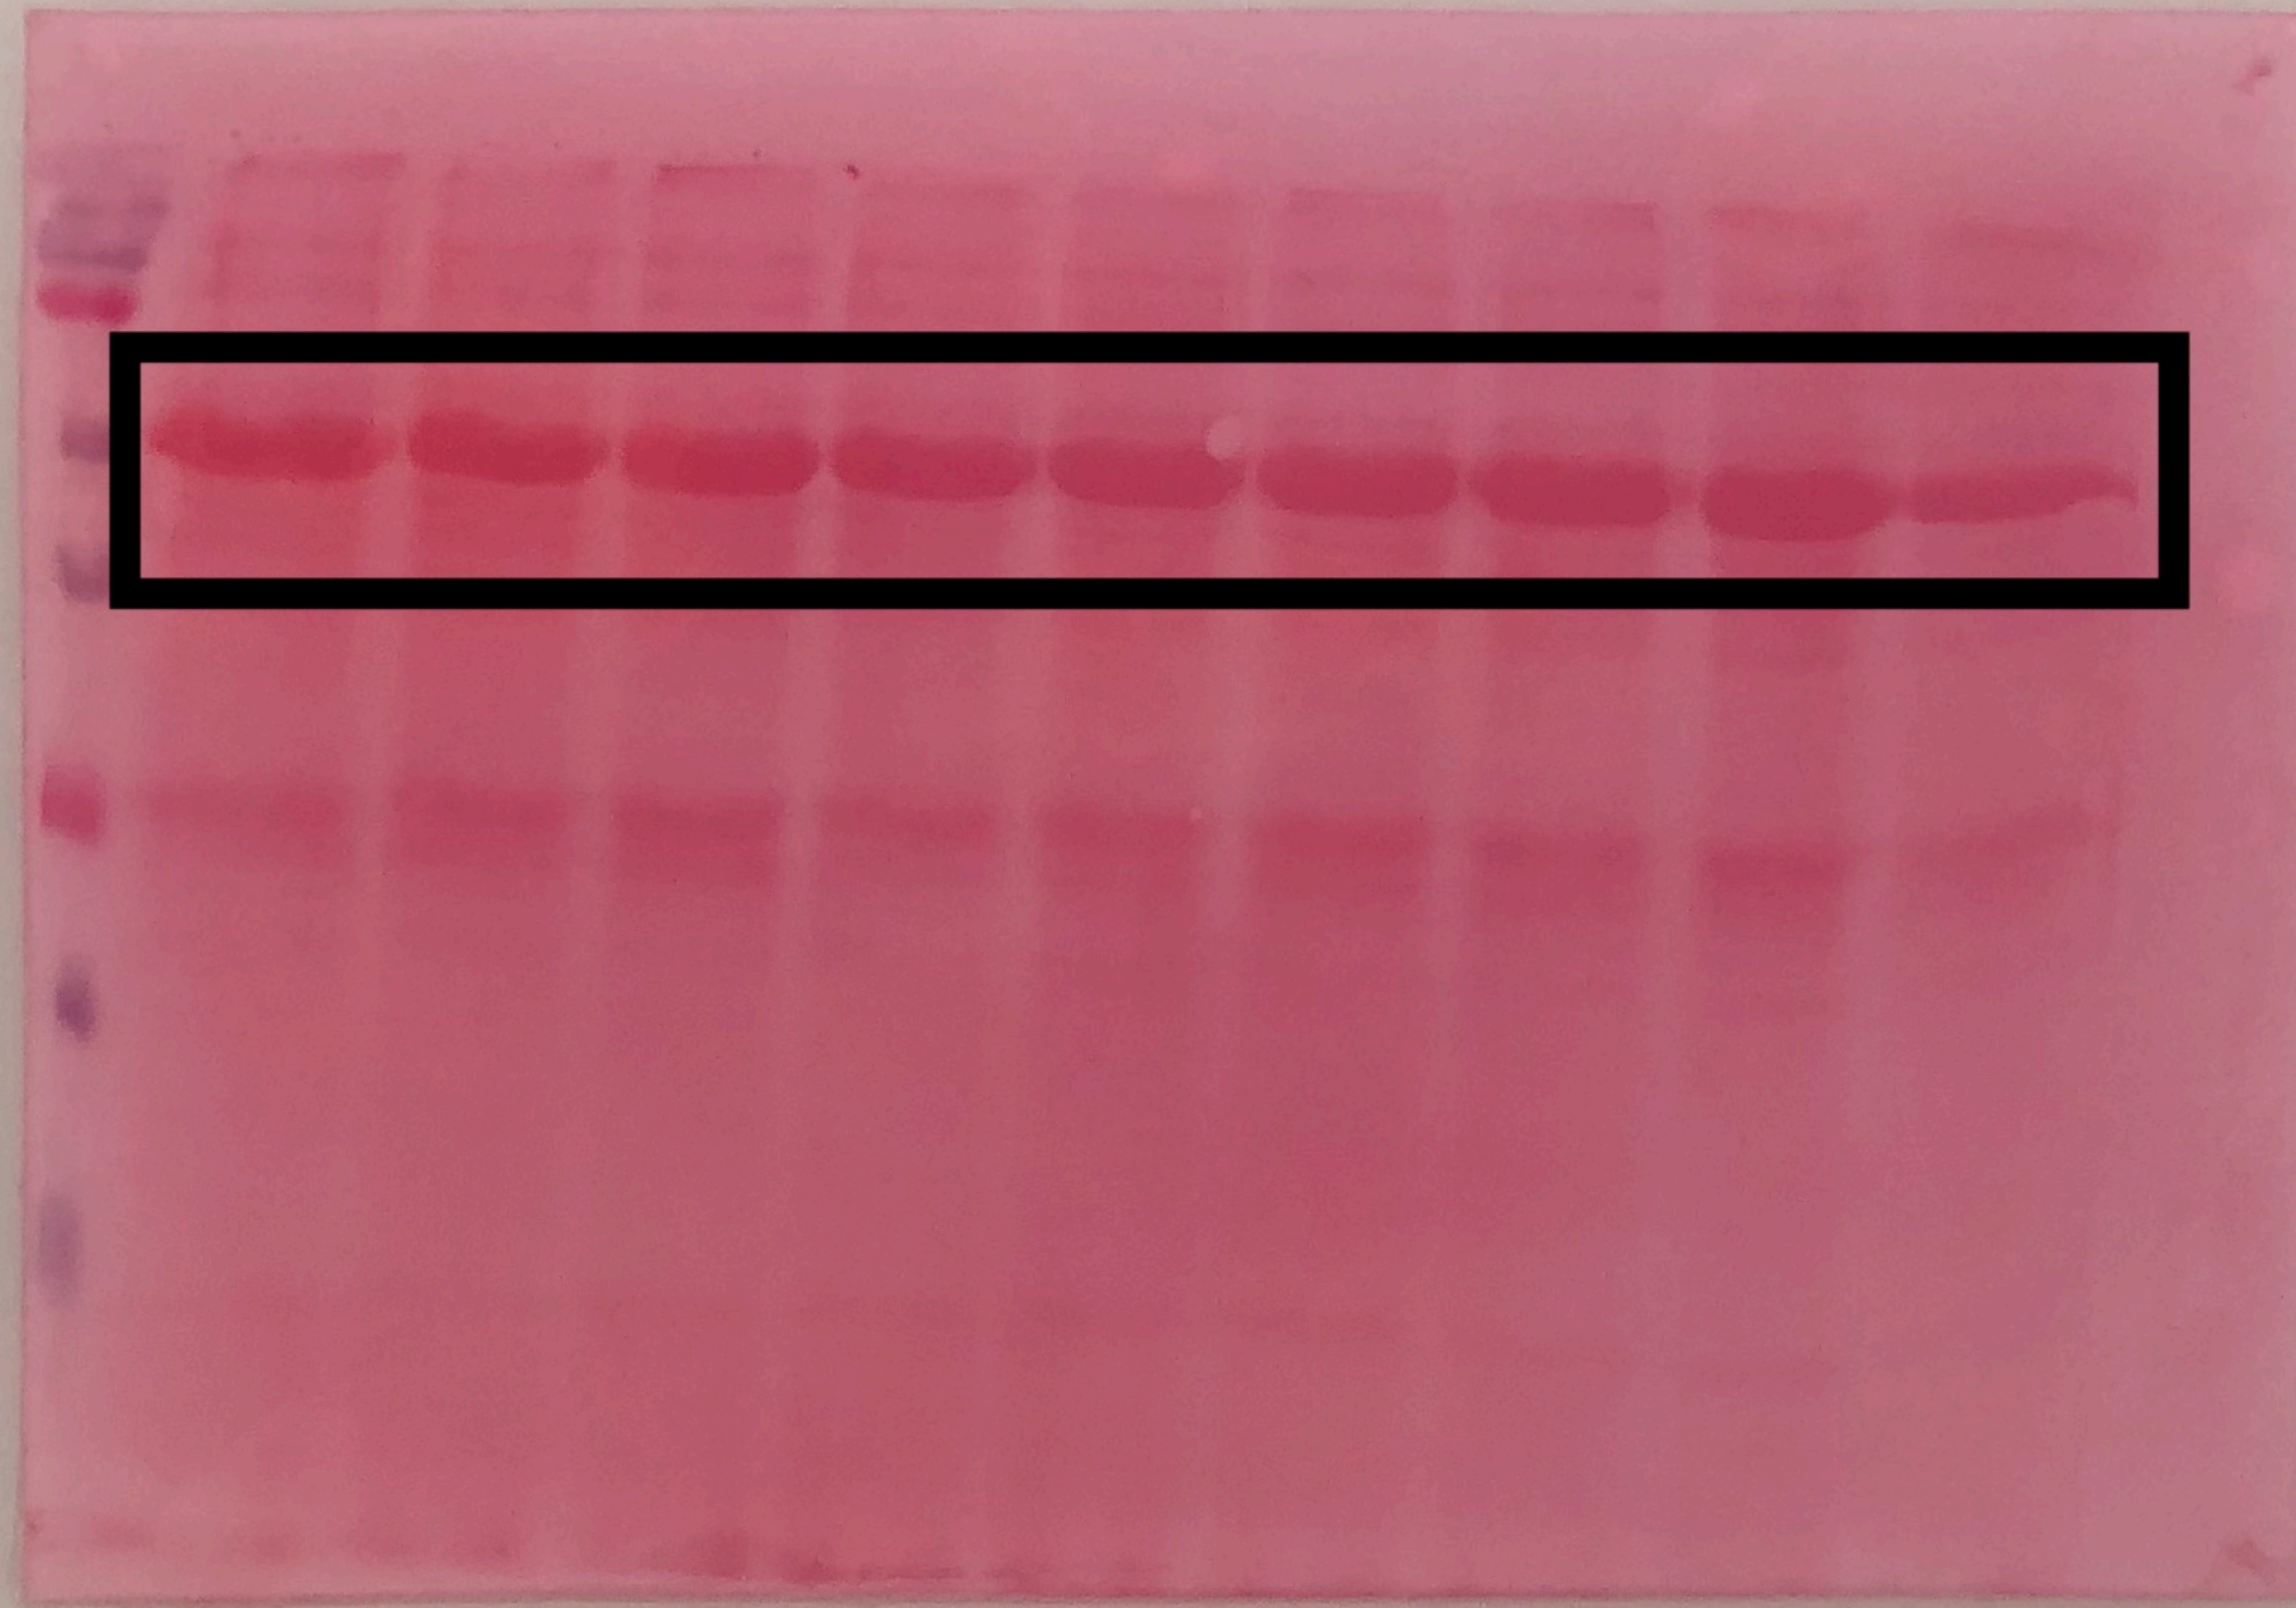

10

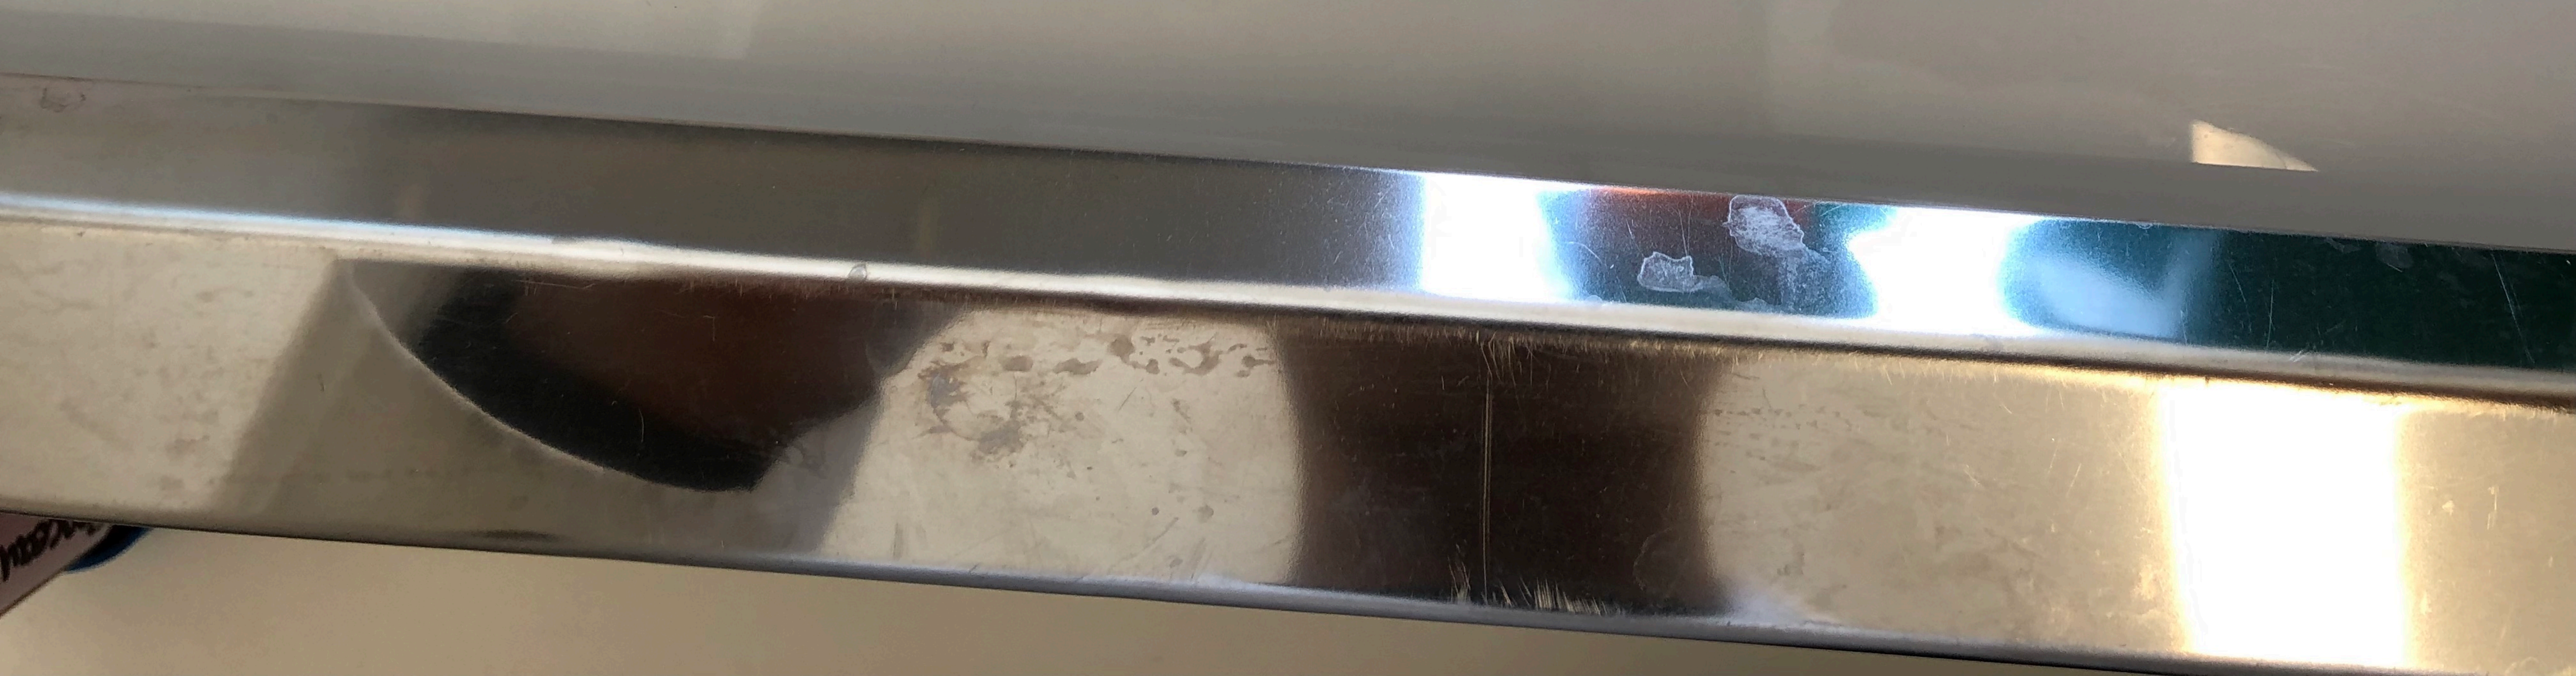

Supplement: fig5-figsupp1-data4 [file elife-89280-fig5-figsupp1-data4-v1.pdf]
