# Supplementary material for: The structural repertoire of Fusarium oxysporum f. sp. lycopersici effectors revealed by experimental and computational studies
Source: eLife journal article supplement (doi:10.7554/elife.89280), 2023-07-18
Supplement: fig5-figsupp1-data13 [file Figure 5—figure supplement 1—source data 13.xlsx]

## Sheet: Sheet1
Protein	Conductivity
Avr1	6.9
Avr1	4.8
Avr1	4.6
Avr1	3.9
Avr1	4.5
Avr1	6.8
FonSIX4	10
FonSIX4	13.4
FonSIX4	13.9
FonSIX4	12
FonSIX4	11.1
FonSIX4	13.1
Avr1_EEEYGIN	9.8
Avr1_EEEYGIN	9.9
Avr1_EEEYGIN	10.9
Avr1_EEEYGIN	10.2
Avr1_EEEYGIN	13.2
Avr1_EEEYGIN	12.8
FonSIX4_KEVYHID	9
FonSIX4_KEVYHID	6.3
FonSIX4_KEVYHID	7
FonSIX4_KEVYHID	7.5
FonSIX4_KEVYHID	7.8
FonSIX4_KEVYHID	7.1
