# Supplementary material for: The structural repertoire of Fusarium oxysporum f. sp. lycopersici effectors revealed by experimental and computational studies
Source: eLife journal article supplement (doi:10.7554/elife.89280), 2023-07-18
Supplement: fig5-figsupp2-data1 [file Figure 5—figure supplement 2—source data 1.xlsx]

## Sheet: Sheet1
Protein	Conductivity		Abbreviations
Avr1	11.9		ANFC : Avr1N FonSIX4C
Avr1	10.4		FNAC : FonSIX4N Avr1C
Avr1	8.9		EV : Empty Vector
Avr1	13.8
Avr1	9.4
Avr1	12
FonSIX4	14.5
FonSIX4	9.9
FonSIX4	12
FonSIX4	10.1
FonSIX4	9.5
FonSIX4	9.7
ANFC	12.4
ANFC	9.3
ANFC	8.8
ANFC	7.4
ANFC	11.9
ANFC	8.7
FNAC	10.2
FNAC	8.1
FNAC	8.4
FNAC	12.4
FNAC	10.3
FNAC	9.3
Avr1-N	3.5
Avr1-N	4.6
Avr1-N	3.2
Avr1-N	3.9
Avr1-N	2.9
Avr1-N	4
Avr1-C	9.1
Avr1-C	7.5
Avr1-C	8.2
Avr1-C	6.6
Avr1-C	6.7
Avr1-C	9.4
FonSIX4-N	3.9
FonSIX4-N	5
FonSIX4-N	3.3
FonSIX4-N	2.9
FonSIX4-N	3.7
FonSIX4-N	3.6
FonSIX4-C	9.2
FonSIX4-C	7.4
FonSIX4-C	9.6
FonSIX4-C	8.1
FonSIX4-C	7.8
FonSIX4-C	6.9
