# Supplementary material for: The structural repertoire of Fusarium oxysporum f. sp. lycopersici effectors revealed by experimental and computational studies
Source: eLife journal article supplement (doi:10.7554/elife.89280), 2023-07-18
Supplement: fig5-figsupp2-data3 [file Figure 5—figure supplement 2—source data 3.xlsx]

## Sheet: Sheet1
Protein	Conductivity		Abbreviations
Avr1	10.9		ANFC : Avr1N FonSIX4C
Avr1	10.2		FNAC : FonSIX4N Avr1C
Avr1	11.8		EV : Empty Vector
Avr1	10
Avr1	12.8
Avr1	9.8
FonSIX4	12.3
FonSIX4	11.5
FonSIX4	11.2
FonSIX4	12.1
FonSIX4	13
FonSIX4	12.2
ANFC	9.9
ANFC	9.1
ANFC	8.4
ANFC	11.7
ANFC	9.1
ANFC	10.3
FNAC	9.5
FNAC	9.4
FNAC	8.2
FNAC	8.5
FNAC	8.9
FNAC	9.4
Avr1-N	6.1
Avr1-N	4.7
Avr1-N	6.3
Avr1-N	4.3
Avr1-N	4
Avr1-N	4
Avr1-C	9.7
Avr1-C	7.2
Avr1-C	9.2
Avr1-C	9.4
Avr1-C	9.2
Avr1-C	8.4
FonSIX4-N	6.4
FonSIX4-N	4.8
FonSIX4-N	4.6
FonSIX4-N	5.5
FonSIX4-N	4.7
FonSIX4-N	6
FonSIX4-C	11.1
FonSIX4-C	8.6
FonSIX4-C	7.5
FonSIX4-C	9.9
FonSIX4-C	9.5
FonSIX4-C	9.3
