# Supplementary material for: The structural repertoire of Fusarium oxysporum f. sp. lycopersici effectors revealed by experimental and computational studies
Source: eLife journal article supplement (doi:10.7554/elife.89280), 2023-07-18
Supplement: fig5-figsupp2-data4 [file Figure 5—figure supplement 2—source data 4.xlsx]

## Sheet: Sheet1
Protein	Conductivity		Abbreviations
Avr1	5.7		ANFC : Avr1N FonSIX4C
Avr1	5.8		FNAC : FonSIX4N Avr1C
Avr1	6.3		EV : Empty Vector
Avr1	6
Avr1	5.5
Avr1	6
FonSIX4	10.4
FonSIX4	13.1
FonSIX4	11.7
FonSIX4	11.8
FonSIX4	12.5
FonSIX4	11.5
ANFC	9.5
ANFC	8.2
ANFC	7.3
ANFC	10.8
ANFC	11.1
ANFC	10.8
FNAC	5.3
FNAC	5.5
FNAC	6
FNAC	5.4
FNAC	5.5
FNAC	4.6
Avr1-N	5.2
Avr1-N	4.9
Avr1-N	6.5
Avr1-N	3.8
Avr1-N	4
Avr1-N	3.8
Avr1-C	4
Avr1-C	4.4
Avr1-C	6.5
Avr1-C	4.2
Avr1-C	3.9
Avr1-C	5
FonSIX4-N	3.6
FonSIX4-N	3.5
FonSIX4-N	4.8
FonSIX4-N	3.9
FonSIX4-N	3.5
FonSIX4-N	3.2
FonSIX4-C	6.5
FonSIX4-C	6
FonSIX4-C	7.7
FonSIX4-C	6
FonSIX4-C	7.2
FonSIX4-C	7.1
