# Supplementary material for: The structural repertoire of Fusarium oxysporum f. sp. lycopersici effectors revealed by experimental and computational studies
Source: eLife. 2024 Feb 27;12:RP89280. doi: 10.7554/eLife.89280 (PMC10942635; doi:10.7554/eLife.89280)
Supplement: Supplementary file 2. [file elife-89280-supp2.xlsx]

## Sheet: Sheet1
AF-W6Z3Q7-F1-model_v3	0.001727	213	MLEKRVPVENPCPEGSTWDSRMCNANINERAYTDICKFDGEDLFIDIPGSCPEENVCMITGNMENDRFIFDAICVPKTPPSQDVITRRDARKRRVLAQYGRRFKKKGVRGGGAENIPVYIDHRAAFITAEFVSVDGDFIVTPSILNGYLKGTTPRVCKSAQYFEQGDRKHCLPADGPKPLSIGGNVSFLYDLDLRLDENTWLFYYMGCGLGKI	Bipolaris oryzae ATCC 44560
AF-W7EQ97-F1-model_v3	3.286e-10	285	MVSSLRHYLQFLAILCFASFPLVNALLAEEGTLAGDDSGVPPTPFNEAALLAVLDQSPDQKSPANLFKIPIPFTGDPNPQPNGDCQPLSGHYAESADDILCNQKHRTATLSYASRRSLCSNGGRRIIECQLCYGLGVAFPSAIYVEYQTCGGTKTCAQGEERYNRWGRREPFSNCVPTDTIFRAIIAKGSALREYCTSKFTFSSAGGGKGRNFAFKSRLYNSDTGDREPAKWMYLKIDGAYARSAQSVEDWSTTFEINQNDKVEMCAYPFDTGMNLELDWSASFA	Bipolaris victoriae FI3
AF-A0A2S6CI52-F1-model_v3	9.858e-05	246	MHLLYLCLVSLILQFAGWASAIPLESDVLDDASQNSDNGTRVAAHTALVKRKTASMFTIGVCRDIRVRPRGGVWKFDQAYCSRVGQLGSDQAYVVTCAASNDQANTREVEGNCPGDSKCIQQNGVNQFNEDVTDIFCVDRAQVREWTINSQWGPKPITQCTAGYNNDGQRGGTVELVTNVLDQGQHNLISPADNHFQIDGHKVGHWAANGVVDSGVIWLRAHSAVQPCVTGKVGQILRAITARIYE	Cercospora berteroae
AF-H1VFM4-F1-model_v3	3.681e-21	225	MFSLLVLILPVSCVVIPLSQVEDSATKLLLDVAPVELDVALAVHEPLNTTSLAIIGPRDARTNPPCPPGQVFDRSICYTSGIISRYCNTVPQSPNGDRKEVFCANNEVCVQRLLSNGKPFADCQLISSLIQWRTDPIGSKEGCTTASSKRGKTHAMGTIVYDINEHPIQVGKIKYFGEPGDVPKGTSGTTNNFASESWDFDNGHFMRICITSMGNGNLNAFSWLI	Colletotrichum higginsianum IMI 349063
AF-A0A135T8F3-F1-model_v3	3.315e-07	218	MRTLPTWFRESLKHEAPRLPLSAEVVAPCPAAAERLALTVRQWLYREATCDRTGTDVNTFKVSCMAENSHADILYRLPGACGKNQWCVEFHGYNEIGQGAWDVTCVDKPNIHTWVANTFSNPGKVTTCSAGWNNNGKRNLKATFEVDVMDAGGINRISPKEVYYQLGGKRIGVSRSGDSEVGSGSIIIPPGGSIQACVTAYSGQIINMLGALTSLVSL	Colletotrichum nymphaeae SA-01
AF-N4UQU3-F1-model_v3	2.283e-05	400	MNAMVLFVLLLVQLLGVSKGAAQDDGPLVLYNLTIEEFVAKADELAHVGANASGSRADGHHDDRAAVGKRAAVGGETRNSIIVQLVVEELATLCEGHFGPGWRPLSGKCINLAQITVTCGNPEGTAADDEAIEHNCPPPQICASVVGNNFRDSIATFGYCGARIKVDGRQQYGQEVDYIGSWFPESPKTPGTFNDYVAMKGGIEGAFLFAGGQGNNIRKEYGLGLSWACFKCPGGLLKITARRSTDAVGLSFPAFSEAGILLHRRPVLDSDINQSTIWAPGFFDPKTASSSCKLPAWAQLLRMYLALAYNMCIEARSGDARLRRDLPQLKASRRATTHTWRVPASRATNRESALSSDLSSSPHPARCRIIRGSLVLLFALISVSRYEFGRLLRTMPTTTV	Colletotrichum orbiculare MAFF 240422
AF-N4VY57-F1-model_v3	6.506e-08	228	MRPSLIAAALIAAAVPAICVVIPPSEAEDSTAKLSRSNVDVIPAQLERRNSSSAMTGAQEAFTRIPPCPAGQTFQRSICFSYQIVRRFCITNPRNPAIEDTQTVHCQSDEVCVERNLSDGRSYAECHPLATLVRWKTDPVGQKRGCTDVSNKLGRYHNVGTIVYDSNSNPIQVGKIAFTGEPGDKDLGYGGSTSYASSQLWNFDAGHFVQVCIISAGAGNLNAFSWLW	Colletotrichum orbiculare MAFF 240422
AF-N4V2L7-F1-model_v3	6.679e-05	193	MLFSAVLARSPLLFAWRVSAEIRHGEPQISYNLSFKEHAAKAAVVLDPVDSITSEPPGSHLADIRKRAPVGGEINNPVPIQVILDALAEVCNAGVRRLNNPFRAVNGHCISDQLVFIHCGRTVGVGNMSKTKIHACAKNEACAEFDANNFNHFQQKFGWCGPRIEVDKRQEHGRGTGQLTDHKLTAVGFTAKT	Colletotrichum orbiculare MAFF 240422
AF-A0A1G4B7M5-F1-model_v3	0.001826	240	MHYQSFKLAAIFAALLPSGLGAVIAPLSEHDIQWETTTEDIDITQQPPFESKPQYRFSDSSGAIEKRSGVGQAVCSKIWWKPQSGEPEDGWYFHEAWCDRSGNKNQNTFRVDCFGGRNDIETLPRRKGSCGIGEYCMDVAKGADIRGNRAHDIACVKKENVHTWVAGALANRVPDSPICSGRWTNGGTVNARATFDVDVLDSDGIHEAISERISFLLNKRPKPIITISISISVISENSLQ	Colletotrichum orchidophilum
AF-A0A135U0R1-F1-model_v3	0.0004922	224	MKFILFATVFATACAAGPLAQVRDLTGSPEHTLSYVDVTPPELEPRNANLTDLVARDTLPNTACPAGQTYDRSVCFKSNTIRSFCVANPRSNREKITDTPCGASEICVQRRLSSGKSYAKCIPVVDLVLWKTSPDGNKEGCTSTTVKSGGNHHIGTIVYDVNRNPIQVDKIRYLGEPGEVDEGIGGSTPFFSSNLFNFAGGHFLKTCVFAGGFGNLNAYSWAWV	Colletotrichum salicis
AF-A0A4R8T8P1-F1-model_v3	5.909e-06	257	MNATVLFVLLLAQLLGVSKGAVQDDGPLVLYNLTIEEFVAKADELAHVGANASGSRADGHDDDRAAVGKRAVVGGERRNSIIVQLVVEELATLCEGHFGPGWRPLSGKCINLAQITVTCGNPEGTAADDEAIEHNCPPPQICASVVGNNFRDSIATFGYCGARIKVDGRQQYGQEVDYIGSWFPESPKSPGTYNDYVAMKGGIEGAFLFAGGQGNNIRKEYGLGLSWACFKCPGGLLKITARRSTDAVGLSFPVKPL	Colletotrichum sidae
AF-A0A4R8TJH1-F1-model_v3	3.467e-05	252	MLFLSLLVPFMILLEGAVRAKALPQIYFDLTFNEFAQKVSELAQLSANASSALNNDDDDDDDRRRRRHDASIQKRAPVGGEINNSPVTQVIIEDLAARCVAAFGAGYRPLSGKVNTDTQIKISCSVDGSIARDTNYDCPPSEAAATIVGHNFRNSIATFGYCGARIKINSRDDFGSVTTYFGSWFPEPPNSPGSYNDYVALAGDQKGSFVFGSTSFKNSGSGHSWSCLACPGGLLKITTRVITFAVGVSRKN	Colletotrichum sidae
AF-A0A4R8PM09-F1-model_v3	6.399e-16	275	MSFLTLVVRGLALLAWGVSAHDPEPQIFSNLTRDEFLAKVRDLRGDAASPVNVTKRLVVGGEVNNNPLTQAVIETLARKCDELVGYGFGWRPLRGRCVGQAEGGHARVEVTCGHLFPEAPDVITSVKTFLCDVDEPCLEIHGHTFVNTEADFAYCGIRIKVETAEHIGTSTQYEGSWVTADAKTGSFDIFAELGQALTGFYDYGGGTGKRTMQSHAHARSWTCLSCPGGLLVITAAVKTYAAGLVFVTTTRRRPPSGRIQGVGEEPEQPGEPEDV	Colletotrichum spinosum
AF-A0A4R8Q042-F1-model_v3	3.863e-06	260	MQLTLLATLLPGALAALAAPSVGRRAEWTTTTEPIDLSTLGTIELYSQNPNPQALALRQLQDRSSASATICRGRRPLPRSGAKWLFNEATCDRTGTDVNTFKVSCVAELQHADIIYRLPGACGPKQWCVEFHGYNEISQAAWDVTCVDKSNIHTWVKNAFSSGPSELTSCSAGWNNRGKTNLKATFETDVMDAGGINRIAPQEVFYQLNGKRIGVSRGRDSEVGSGSVIIPPGGSIQACVTAFSGQVINMLGAVTSLVSV	Colletotrichum spinosum
AF-A0A4R8QKV3-F1-model_v3	3.792e-15	248	MRFFSFLVAILPVSCSVIPLSQAEDPTTELSLDVAPVELDDAPAVGGPLNTSLATIGPRNLVRRVVFPPCPAGQTFDRSICYTSQVISRYCKTNPPSANGERKEAYCSDNEICVQRNLANGLPFATCFAISDLVQWRTDPDGNKEGCTRVGSRGQNLGARRVGTIVYDVNRKPIQVRTIRFTGEPGDRDTGIGASTSYALSQTWVFDATQFMVGKYKVFSILILTDQSIVCIASGGYTNLKAYTWFAA	Colletotrichum spinosum
AF-A0A4V3HWB5-F1-model_v3	3.158e-08	294	MAFHTVPILIALLSVLSFVQPSRAADRALVTVDAYNKSSLNPSVPNNGPLHLSPSPSKRELFEESEELSDAELDNTSPHQKRSPSRLQSRQARRRPAIYNEIDEDTKCHEHDGPNGHGGSDIFHYNSYGSVCAGSNRQITCRPYTPAYAQFYPTLQSTIPCQTGFVCRQNGFRQTRFGDSKPYTTCVFNSALKTWVVGGREIGEKCCQKFRIPSAGGGKTVRFHECAVNAATGIYKQVEKMYVKVNMAYYKSIPGPVSDWTGDVGGIKATDDLELCAYPLTGDELKMSAQFTIL	Colletotrichum trifolii
AF-A0A4R8RP68-F1-model_v3	2.7e-08	284	MDLCLLIGAIFLLSRVGCIPILGATAAAEDTAYISHSEPPPTSNAFSEGGLVKVLAHNGSFPRRVIDHTSTVSLNVGGTSPDIRILPRQYQSSDEDIKCQDDHDRSLPPANRVILVYYAWGSICQDATRVITCRFFEPEYLRGVDRPDLLSRIVCPRGQVCRQDGARQTKFGDSRPRTTCVPVPTIKQIFLRELKEACLRFPLPSTANRKRIRVHEWAFVPISGLYRQVKWMYLKVNGAYVKSAQYISDWTVELSGVTSSDNFEVCAFPQTADPITVDIQVTIL	Colletotrichum trifolii
AF-A0A4V3HT84-F1-model_v3	5.286e-06	272	MEPKTIFLAVLAQSLVLFNLGGATSATQHRAGTVPQEPLIYYNLTREEYMNMADDGAPITNITSLLAPDPNHLEKRVAVGGESNNNVVLQALIEDLAVACSVQYGFTSGWRPVRGDCESRNRVKLVCGDPGTVTEPWLEGTHFYDCSEDRLCAQFMAYNFRGSLSTFGLCGLRVRINELRRETGHRVRFQGYLNLNDIPTGGGPFLGQRIYVEMEDNVNAHFEFTAGTLTNPFITQGDGTSFSCLRCPAGLLRIYAVTLAEAVVYRHFINHG	Colletotrichum trifolii
AF-A0A397JFP1-F1-model_v3	1.304e-09	235	MLPRLFLISIILLVGITIVVKGTQVAETIEVIKAVKFPRMGSGNLTLDRRFIVGIPGLPQCPNPNLPQLVSSRCFSIKTLYSICMDPRYPRASSIFSQQCLENTVCMDFITDPGPSTPPEQAAFGLCVDEEFAKRFDNGDKEGVYCKTYVLDGVTGNRATLSIDVYDGSQNPAKVRSVSISSGSSSGSKENTSNYSRIINCKNKQKVKVCMNVLSAGITLYARFTFLDGTYGNSK	Diversispora epigaea
AF-A0A397HR06-F1-model_v3	0.0031	235	MFSQLFLISTLLLVWISTVAIGAPVVEIIERIKAIEIPRIGSGDLTLNRRFLSGIPGLPQCTDIGFPTLLMSHCLDAKTIRARCSSTRDPVENKWTITTCPDDSTCMDFQALSSGIIKSEFDVFALCVDEDSLRKSKHDRSGVFCKTYELNGVAGKTVTLSFDIYDVNQKPASVSDIRFETGRCNTKKKYNTRSSKNSKISSKNIVVSKFLMPEEESSSPSFFQAMSGLEEIIMV	Diversispora epigaea
AF-A0A397IW92-F1-model_v3	6.637e-11	234	MRSRLFLLSTLVLVGITTVTIGAPVEETIEAIKAVEIPQMGSGNLTLNRRFISGVPGLPQCPNADFLLLTSKCLDEKTIQEICVFPANPEVRSESNTECPDDTTCMDFLTDPIGGQEIPFALCVDNGSIKEFRKDRKASYLCKPYLISVTNGIATFSIIVYDAHSNPAKVYAIKFSSGNQSGTRYNTYNYSRIIDSKKGQKIEVCIETETNAEIELAVMFSYLDGSYISNGINK	Diversispora epigaea
AF-A0A397J099-F1-model_v3	3.532e-10	233	MLSRLFLISTLVIVGITTVAIGATVTETIEVIKAVKIPQMGSDLNRRFIVGIPGLPQCPDSRWPQLLFSYCVGPKKLYSCCRNPNDPTTDTKYILTCPETTTCMNFVTDFGSAPGPEFNNFAICIDDETLKSFKNDDHDGIFCKTYEINGVTGDKATLSFEIYDANSNPAKVRNVFFTSGSQSGGHQNTNNYSSIINCKNGQKIKVCMDAIYYGITLYATFTFLDGTYGNSNG	Diversispora epigaea
AF-A0A397IND6-F1-model_v3	6.993e-11	231	MLSRLFLISTLLLVGITTVAIGAAIGKTIEVARAFKIPRMQSGNILNRRFISGVPGFPQCLNANFPLLESSSCVTAKTIRAACTSEDQPGRVDSDITCPDDTTCMDFVTIPNEEEKIDPFAVCIDDKFLRRFDSDHKSGVFYKTYVLNDVADAKATISINIYDINQKPAQITKVGITVGNQSGTRFNTHNYSRIIDYETDEKIVLCLQTGTKEELYGYFSFLDGTYIVTNF	Diversispora epigaea
AF-A0A397IKD2-F1-model_v3	3.02e-10	231	MLSRLFLITTLLLVGITTVTIGVPVAETIVDIKAVELPQMGSGNLTLNRRFIPGVPGLPQCTDINYPELMSSWCLSVKAIRANCASISNPADMKYCDTTCPKDTVCLDFRLATTNNAAFSQFALCINKKDAASFNGEKGVICQSFAYVMESPFGTVAINVYDISNKPKLINAISVRAGKQYMSKSDTSNYSVILANMGKQKLKVCLQTASNVALFALFAVIDGTYSSIGGK	Diversispora epigaea
AF-A0A397INP0-F1-model_v3	4.116e-09	229	MLSRLFLIPILLLVGITAVAIGAPVAETIESAKAVEISQMGFGNLTLNRRFIVGVPGPPQCPNKNFPQFLSSYCFGQPLSVADCASQTNPPGIAEYDMYCPKASTCMDFRTDNEDEYESKFAVCIDNKLVKHIGNGGKNGVFCKTFEFNIKSERGTVSINVYDNTQKPFQVESFNIYAKNENLFMKNAHTYSFILDNEVKKIKVCLETNRKTEFFAMFSYLDGTYSSNW	Diversispora epigaea
AF-A0A397G313-F1-model_v3	2.582e-10	227	MLSRLFLIPTLLLIGITTVVIGAPVAETIEIIKAVEIRNMGSSNLTLNRRFFEGIPGLPQCPDPAHPDLMSSRCLDAKTIEATCAVLRNPDDSTVSVTNCLEKHTCMDFRGGSAVNAFATFAICIYDDLIKKFEDRDKDGVVCKSFQYIINSSSGTLSIGVYDYRQRPFQVQEISITMNNQYRSMSNTYNYSTIIDGNDVKKVEVCLDYGSKTPFIGMISLLDGTYG	Diversispora epigaea
AF-A0A397GJQ8-F1-model_v3	2.45e-10	225	MLSRLFLVPTLLLVGITTIAIGAPVAETIKVIEAVKIPQMESNITLNRRVIQGVAECTDPRFPNLRYSTCLTQQVIRAICASADNSGAVAPSNTVCSPDTTCEAFETFEGKSFALCLEEGVAEVYRGYMGKDLCKTYEMKGITEGMATLSVNAFDSNQQPALIPSISISSENQYGSTSNANNFALVVNTKNKKKVKVCLKMKTAVTKLITSVFFCFLNGAYSSKN	Diversispora epigaea
AF-A0A397G579-F1-model_v3	3.722e-10	221	MFSQLILISTLLVGIVTVAIGAPVAIEIPQTRYGNLTLNRRFISGVPGLPQCIDTNFPDLVNSSCIDENSIRAYCAPANNPSNQKECDTGCPEDTTCMDFRTESEGGPYAKFAICISDKSLKDFGEGGSGEVCKSFKTDIKSDKGTVSINVYDSTARPVQVSSISIYTHNQVFTKSNTSTYSIIINVGSAVVKTVKVCVEIAARIYVAHVFYTIINEAFGG	Diversispora epigaea
AF-A0A397GYQ5-F1-model_v3	4.147e-11	208	MFAQLCMISTFFLVAITTIAIELPLEESRNPTLNRRLIPPGSPQCNNPRFPAFRSSSCKTKTTYSALCEIRESAGETSINQCPPSTSCIDFASRNLTPFAFCVLDSQVKTWGNDGKNKEICTGKFKPNFQKGAITIGMTTYGTNGNTIQVDFLGTFVNDTFLSSVFTADSHSAIFSGYDVNDDVNLCFSGGNSGVPVTSFGAVLSGLF	Diversispora epigaea
AF-A0A397IHE7-F1-model_v3	7.706e-09	195	MGSSNFTLNRHFIVGIPGLSECPDEKYPDLIYSFCLGEKKIISHCIDLQYSMYLAQFYSDCPDNFECIDFATDPGPSVPLQYENFAICVDEEFIKKYKHDKDGVFCQTYVINGVTGEIATISINVYDSSSNPVKIRSIGVTTGTQYGSKQNMNSYSKIINCKNGQKIKVCTDIAVAKVTLFAMFTFLDRSYSFSN	Diversispora epigaea
AF-A0A397IL94-F1-model_v3	1.508e-06	184	MLSRLFLISTLLLVGITTVAIGAAIGKTIEVTRAFKIPRMRSDQPGWVDSDTTCPDDTTCMEFVSIPADEEEEIDPFALCIDDDFLRRFDSDHKSGIFCKTYVINDVANAKATISINIYDITQKPAQVTSVSITVGNQLGTKFNTHNYSRIIDCKNGEKIEMCIQTGTKDELFGYFSYLDGTYS	Diversispora epigaea
AF-A0A397GM74-F1-model_v3	0.001035	179	MLSRLFLISTLLLVGITTVAIGAPVAETVEVIKAVKIPQIGSGNLTLNRRFLTGIPGLPQCTNAFCASTANPDLGIECPTSCPPATTCLDFETDPGPEQVDFAATVSFTIYDAFSNPAKAENLKISMADQTFTRYNTNSYSLVLSSKKDQKIEVCLKTVAGVALVAMFSYLEGSYISKG	Diversispora epigaea
AF-A0A397JAX3-F1-model_v3	0.0006466	154	MVEVTSQRRPSAGLGDYRIRQSRRNPSKGSTCKYSPEDTTCMDFITDADGGDEALAFALCLDDGFIKDFDNDKRDGIFCKTYNVKITNGIATLSINIYDATSKPAKVQSINISMDGQFGTRYNINNYSRIVNSEDEETVKVRGDWYPYHFVWHV	Diversispora epigaea
AF-R0K6Q1-F1-model_v3	0.001275	293	MLFLLLYLLFGFSVCGTPLAPEGEPDFSLYFDRSEIDPYMRNEDGEHALHQAVTRRLDDHFRTDEAAHALHVRGLNNKRASAKVTVYYRPNLNDVCIENGLRRVHAAAYVNVCINPRQFSVICDIDEEHDEAPIVYGNCSPGYFCVTVLKDTLTVVDPANLHIGQAVEPICTQEVKLDIFKITESLLGFVSEWWRAPGKFKVFFGRMALQGQTLGTAYNLRWDWKTINSKFGTQAGFKRISDTSSATHHEYEMSYDYNYRGDMQFRAAVDWKEPLGHLGVLTLLVYFAAISPK	Exserohilum turcica Et28A
AF-R0I8Q4-F1-model_v3	5.909e-06	289	MGLLRFTTVATIISFHLSNPVSATPIREDVTTHASVHDIIPREYIEQVFNYHRNLAEAESHASWRRNKRTLSILQKRIVARTCPRGSTWLSRDCMPDESEQAWQDTCQDNHSLDLFDVDGLCPEETVCDDYRPYLGRTDEHGHPKPEHDIICRPKVAPSQDTITTDPGTSQRSQYGYRHIPAGNTKSMDIAVPVYLEVDHASVAAEFLGPGKKEVLYPYQTLTANLRGHKLNLCRQFQNNQNKAHNTRSCIPTDQTNHLYKGQTIDFTFAIGLIDSAYFFYSITAGSHK	Exserohilum turcica Et28A
AF-A0A6G8MPE4-F1-model_v3	3.506e-08	285	MVSFTRILGLLTISYFQSCSSVYAELARWVSVEGNSTISLPFNETALLAVLTPNNYTTRSLTKYDVNDPLSKRAVNAYDPALHPNGRCPINSFYVPHIDDTMCDAQFHIGADASYASQSSSCSRSIFRRLHCQLCAGRNIRNPSEIKYYDTQCGKNQVCTQASPRWNAWGKLEPQSYCHDANTLVELAVAKGATLREYCSQKFRFPKAGSGKTATFHAWLYNTVSGLREPAKWMYLKVNGAYARAVQSSEDWTTNFPIDSGSSCEMCIYPFNTDYDLELDWSAEL	Exserohilum turcicum
AF-A0A1L7TVF6-F1-model_v3	2.845e-08	247	MRPQSTASMLVGLLLSGMVSSAAVSNLKEDLTTRGQAVDSTGLTPLTFNLDEISVATPGQTVHDCHPDEEGCKEKAKVLSRATPATRSICASGQTYTRSECLKSNILTVYCRDGNGRVWRKWVVCEATEICVQNDLDPPYATCKPVIDLVLWYTNSAGGSTVSEKYIHSTKKQSTSKVGNMYFDRNGNYIKLFQTDFYREPGNFFVGETLNANRAYSQSVNWVNTDNVKVDVKTGGDGGISVYTFLT	Fusarium mangiferae
AF-N1S2K0-F1-model_v3	1.681e-21	232	MKVALVISIFIASCIASPLDPAKTPTSPPGAEHTLNYVDITPTGPEFGNVNGSSALISRDTLPHTACPAGQTYDRSVCYNSHTIRSFCVANPRSNREQITDTPCNSGEVCVQRRLSSGKSYAKCLPVRDLVSWRTDPDGDKEGCTTVEANPIGYHSLATMIYDINNNPIQVDKIRYLGEPGDANEGIGGSVSNFSSDRFRFTGSNYMKANEGLVCVFSGGYGNLNAYTWVWN	Fusarium odoratissimum
AF-M1GN93-F1-model_v3	0.004704	154	DLCVEKFGAGHRATSGYCRPDRPATRKIECGKPGVVGRVGTAQKACPADQLCQTFQAYNFRRSNHEKSSFPNCGPKIEVKERHDIGRHTEWEGTWFPESPKSPGTYDSFVQMAGSLNGYFDFDGAYSSGEGFSSRGSGHSWTCIDCPGGKLTIT	Fusarium oxysporum
AF-F9GAE6-F1-model_v3	8.913e-06	220	EGDIIGTFSIDSSDSQPIKVRWLDTPEISGRSLVKRSALSQSVCTHAGTATGADLHWLNGICTGKSTYTVNCAPADNKNAGSSHPGTCPPDEDCFQLERVGNFWGDLEPDVTCAKSGTVFDAADVKTATHVNGKVVTRAGKPKVQARLIRLKAQVYRRDGHYGQTSRMGFFRNGKEQYHIDNVASMGPTWNFDPSTDQSFSFFFTPGPDAFRVQGTINLA	Fusarium oxysporum f. sp. conglutinans Fo5176
AF-A0A240FGM7-F1-model_v3	1.675e-06	293	MTRFHLILLPLLFSWFSYCLGELEVSDLSDQPPSVENTYRDQAFNEEELLKVVDELSVKLTNHTERALVSEAALQRRQNDQYPNGVCPSGGRFYLDVDEDRSCNSKWGIATPDETRTFGSTGSVCAGTFRRITCACCFTTHPITNNDAPRMDGIYCQKWEICKQEHERWSKWGKLVPHTSCVKAKKLTEIFIATKKVVKEYCTPKRWLPSTGKGKNAKFHAWAYNYSTGQFTKLKWMYLKLDGQYAKSAPGISEWGLTYSVNEHNAIELCGYPSDDMQKNSIDAELQWEVTLE	Fusarium oxysporum f. sp. cubense
AF-A0A559LLL3-F1-model_v3	8.523e-22	227	MKVALVISIFIASCIASPLDPAKTPTSPPGAEHTLNYVDITPTGPEFGNVDGSSALISRDTLPNTVCPAGQTYDRSVCYNSHRIRSFCVANPRSNREQITDTPCNSGEVCVQRNLSNGKPYAKCIDTHQLVSWKTSPDGGKSGCTTVQASPIGSYKLGTIVYDVNKNPIQVSKINYLGEPGDADDGIGGSVSSFSSDLFRFTGSNYMKVCIFSGGYGNLNAYTWLWS	Fusarium oxysporum f. sp. cubense
AF-A0A0S3CV59-F1-model_v3	1.951e-05	210	MSGFPGNETGSSLSRRGRIVNLGKRDPVGGEAHNNRVTNDMLQALHDLCVEAYGTGWRAISGSCQDQATRRIYCGNPNVAGSRRMTTRACPSGQQCTTFEAVNYRSVRNIFPVCGPRIEVTERHDIGIHTEWDGIWYPESPKSPGTYDSFAQMAGSLNGYFNFDGAYSNGEGMSSRGSGHSWSCIACPGGKLTITSTDRATWAIGYTSPH	Fusarium oxysporum f. sp. cubense
AF-A0A386JLB6-F1-model_v3	1.272e-10	179	GFGAYAQEAAVEEPQIFFNLTYTEYLDKEAASHGSSQTSDLPWNDTMSGFPGNETGSSLSRRGRIVNLGKRDPVGGESFNDRVTNDMLQALHGLCVENFGTGFRATNGYCRANRRATREIQCARPGTRGAGSVTRTCPQNQECTTFVAHNFRSQSPTTDKSTFTVCGPQIDVNDRHDIW	Fusarium oxysporum f. sp. cubense
AF-N4U994-F1-model_v3	4.101e-22	391	MKVALVISIFIASCIASPLDPAKTPTSPPGAEHTLNYVDITPTGPEFGNVDGSSALISRDTLPNTVCPAGQTYDRSVCYNSHRIRSFCVANPRSNREQITDTPCNSGEVCVQRNLSNGKPYAKCIDTHQLVSWKTSPDGGKSGCTTVQASPIGSYKLGTIVYDVNKNPIQVSKINYLGEPGDADDGIGGSVSSFSSDLFRFTGSNYMKANKHLVCIFSGGYGNLNAYTWLWNTPDSSGSNLVKRSRLTESVCVHAGAATGADLHWLSAICTGQDCFQLEQVGNFWGDREPDVTCSSSNTVFDATDDKEATHVNGKVVTRAGKPEIGPRLIRLKAQVYDRDRHYGQTSRMGFFRNGVEVYGINYVASMGPTWNFDPSSDRSFSFFFTPGPTP	Fusarium oxysporum f. sp. cubense race 1
AF-N4TU13-F1-model_v3	4.51e-29	277	MAPYSMVLLGALSILGFGAYAQEAAVEEPQIFFNLTYTEYLDKVAASHGSSQTSDLPWNDTMSGFPGNETGSSLSRRGRIVNLGKRVPVGGESFNDRVTNDMLQALHGLCVENFGTGFRATNGYCRPNRRATRELQCARPGTTGSGSMTRACPKNQECTTFVAHNFRSQSRTSDKSTFPVCGPRIEVTERHDIGIHTEWDGIWYPESPKSPGTYDSFAQMAGSLNGYFDFSGAYQSGEGFSSRGSGHSWSCIACPGGKLTITSTNRPTWAIGYTSPH	Fusarium oxysporum f. sp. cubense race 1
AF-A0A4V1RXF0-F1-model_v3	5.704e-07	257	MAKSLKLLMLIACMFIACTRAKIILDRSLTGVDMLHEQHKQAPNLSTNELSPRALPVTRRNLGRSICGEHDVRAGNRITQQWKLSTASCRNDKDFHVTCRQNIPNNGQLKEEDDRCNPTETCGEESYTNIWGVVSTDVFCQSNDEDREDSWSTSSSETGETVCGPGLTNKDLQPIPEGNEKFSISIQFYNGMNAGKRRTNVGKAWLQSNKKGIIKTLYSVNGLFWRGILNPSETMQACFVRTSKDDAFVAYEDWTTF	Fusarium oxysporum f. sp. narcissi
AF-A0A7G5XAT1-F1-model_v3	6.3e-25	172	ANLSSLVSRDTLPVSTCPAGQTYDRSVCYKANTIRSFCVANPRSNREKITDTPCKPQEICVQRRLNNGKSFAKCIPIVNLVEWKTSPDGNKEGCTTTSANPAGYHHLGTIVYDVNKNPIEVDKISYFGEPGNVNEGIGGSTSYFSSDLFQFSKSRFMKTCIFSGGYGNLNAY	Fusarium oxysporum f. sp. pisi
AF-A0A7G5XAS5-F1-model_v3	2.997e-08	154	MKFALIASIFVAGCVAGPLAEAQAESAEHINEITYVDIAPAELKPKNTSLVSRDTLPVTTCPAGQTYDRSICFKSNRIRSFCVANPRRNREQITDTPCKPQEVCVQRNLSNGKPYAKCIPVHNLVSWKTGSDGRRLHHVHRHPFGLLFSGYHCV	Fusarium oxysporum f. sp. pisi
AF-W9NDC7-F1-model_v3	1.701e-05	263	MVNITLKVLAGVAAFLAIANASPAEVVPSVESDSIPQEFIDGVLAYFKTHPVNGTSKRDVGNALHKRVPADHGCDPADRWVGRTCRSDVGPREFEDYCRDVDGEVYDVDGICPEHTYCSQLNEQEHGHQILDIICVPATPPREDNIGTKGQYGYRAVQAVNQRGVTQLEKSIGLEEDIAGASVSGHIRSTDRTFIINPANTLTANLHGFQENVCKEDKGDKHHDSRICKPTRRVNLKKGNTIDFTFGLTNQQSGILFYGILRS	Fusarium oxysporum f. sp. pisi HDV247
AF-E3UMD2-F1-model_v3	4.851e-11	214	MKLALIASILAAGCVAGPLAQTESESADVAEHTINYIDIAPEEFEPPKANLSSLVSRDTLPPTCPRYTTYDESICITAGVVRSSCVFTADPGVRRGVNANCNKNEICVERNLSNGKRYAKCIPIAHLVEWKTSADGNKEGCTTTSVNPAGNHHLGTIVYDVNKNPIQVDKISYFGEPGNVDEGIGGSTSYFSSNLFHFSKSRYMKSRDMRTFMT	Fusarium oxysporum f. sp. vasinfectum
AF-A0A0N7HUZ6-F1-model_v3	2.582e-10	163	IDIAPEEFEPPKANLSSLVSRDTLPPTCPRYTTYDESICITAGVVRSSCVFTADPGVRRGVNANCNKNEICVERNLSNGKRYAKCIPIAHLVEWKTSADGNKEGCTTTSVNPAGNHHLGTIVYDVNKNPIQVDKISYFGEPGNVDEGIGGSTSYFSSNLFHFS	Fusarium oxysporum f. sp. vasinfectum
AF-A0A397V5E3-F1-model_v3	1.238e-09	221	MRIFLTQLFKLHIFLVAIATVVLGASLVPRRGSHGILVCSQQNTLIKRADIPFEERCPEEYPTYIASLCSLDEPNKMLINCIRDDDPDHPVDAEYTCEADEICIDRTEFPETPHAFCIKKKCGVPFDNFKQPGQDSCIGHSYSVFQPVSLVVAMMTYATNMNPIQVNYQYIGYNGDTFYSNKSVNNYTLVIKSYNGENINFCFDGGSDQKVQAYGAAWLTP	Gigaspora rosea
AF-A0A397UUV3-F1-model_v3	2.095e-10	209	MFVRLVYLFVLVTITTVVIGIPLNTDLVNTSLIKRDTLADCSTERFVSKTSKCITTTTIELSCIIERNVEVSQKNCSKDETCIDYVNEQNEPFAMCTNNNNVKKWNNEERGIFSTCSPLSAYSTAIGKDIITGMTTYAANNVPIQVFGLSINIDNSSDDDTGFQQQSRSKIIKNYNGSQVEYCFAAGTNASVTAYAAALSDLKSLTSSI	Gigaspora rosea
AF-A0A397W5X3-F1-model_v3	3.043e-12	208	MFIRSVYAFFLVAITSVVIGIPLERSPDIVINSGISLIKRDSYPNCTNQRYPFYQSSYCATSTIVTITCASAENSNLSFILRQDCRPYENCIDYVDQQNVSRGMCADSKNIRKWKNKDSNSRTCSENEAYGASDGKDLILGVTTYATTNNPIRVQMLEAFMSGNSLGRLFNQYNYTKIIKNYDGNSTIKYCFTAGTTKKVTALAAAFG	Gigaspora rosea
AF-A0A397VPX6-F1-model_v3	7.232e-06	202	MRIFLTQLFKLHTFFLVAIATVVLGASLVPRRGSDGTLVCSQQNTLIKRADIPFEERCPEEYPTYLASQCSLDEPNLMLINCIRDDDPDHPFDTDYTCEADEICIDRTEFPETPHAFCIKKLCVFQPMSLVVSMMTYATNMNPIQVNYQYIGYKDNIFYSNQSVNNYTIAIDSYNGENINFCFDGGSDTKVQAYGAAWLTFP	Gigaspora rosea
AF-A0A397SGJ7-F1-model_v3	3.031e-11	236	MKVLFARLCKLYTFFLVAIATVVLGAPLENVPMLKRDTNPGCPPNYPVYFSSRCETASLIAATCKSNGNPPVYLPNNYTPCRADEHCIEHYSPIGFDPKNPQSPHATCVTDGNSERWDNFGNPNADACSVPTDYNNRGQPGILVAMTIYAHDWKPIQVNWLDAYDNDGQLPSDYNKHNYTSFISNYQNDKIKYCFNTGTNNKVTAYAAAWAVYPNSMMSSDALPSDDSSNTSNTPV	Glomus cerebriforme
AF-A0A2J6TR36-F1-model_v3	0.009175	232	MRLLISLGLLQVALSIAAIIKDIAIDDKSSINETEFEGILATNVESSSRTKRFVIANESWCNGTIQGPDIGFYKPDMAVCHWALDCSYKVYYMLDGAPSVWVQAYCNISFYCKQLALVKWAIGSRQSGQSYTQYCSSKNTYNTIRTKTATYKIVMNFWGELGLETQILYGKVLLNGKKLMEGFNTNQMEVTSALAPKGTVQYCDIAGSLALIEGYAEADFVKWGRSNRRRAS	Hyaloscypha bicolor E
AF-E4ZZ88-F1-model_v3	1.912e-08	269	MKITGPFSHATIAAVLIPLIAGSPLASAPNSSPWETTTKDILISEIQPFNLASHVDNLESSTGLSSKRSSWSTGVCNQMNVHFKPVTGGLWHFKAARCDRTGTDVNTFTVDCFGGRNWIEEHIDKPGKCGPREWCVDFRGINNKGDGTNDVYCVKRADIHTWVANTFANPVDDHVTCSRKWTNDSPRSAKAQLLVDVMDNAGKDYISPQNVFFTINKKWVGNSKGGDAIVGSGVITIPPRADIYACVTAIMNKGQILNIMAALTLLSYV	Leptosphaeria maculans JN3
AF-K2RUF6-F1-model_v3	2.414e-06	272	MLPQFTFLLLAAAIPQALCSAIPAEDTNTDLGIPQDFIDKVMASFTTDENGQLVSRAELHKRTIAARGLEKRATPTDQRCGGDTWRARYCMTDVGPREWHDRCRRPNGSIYWVGGICPEFTYCSEEFDNDGDDVIICTPATPPREDNVGSTARGRRQYGYRTIQPRASIGANQHLSSIILQLGISRGSVSGHLRSTDRTFVIAPQNTLTANLHGRQFNLCRSDTNQDDPNAFRNTRSCSPVSDHNFVNGDTIDFTFGLSSFQSAILFYNVTP	Macrophomina phaseolina MS6
AF-K2S9W1-F1-model_v3	9.356e-05	258	MMKISAMLLGLQAALAASRAMAVSPGHQEIQVTSDQGHRVVKRIASSDANWCVGKVHASEGDFKPESAVCNWALDRSYSVYCVQQGVRNPKAYWIQAFCDPGFLCQQHEEARLWNGLKGFDVECRPSKTLVKWAIGTRETGHAQSKYCSPKIQYTTKGGRTAVWEFFAQYFGITGQATQINDAEILWNGKSIQEQIDVNHVGTRHTLKSGDLIQYCGTRGSDALIEGYATAKVVSFLNEAGQEVQPDEHPEVTATIVD	Macrophomina phaseolina MS6
AF-A0A6A6WQY8-F1-model_v3	0.003014	361	MKAACAVGEKCCLDPDDGVPYCGANNECLPTLTFPHFAGVTDEMFENICEGKSNSYPNSLLCLRRNYAKYGNNIFEYNGADATGQTETAANRRNAGCGGASRGGLACAARPLKLNGVNVSQTVAWNCDEFPMAALVQGGTGAAIRCVPARLNGFYGTLWQWFLSAHGYRKGLKMRIKITGCDYTEAPSLRGPIPKRAEDETVLASHGDLTVFSSNMFGGNSNGSNVVVIPLTADGGGSGVYTLDYRLTSGTIVTGSIMDEDGQTYETLDSLATGSSSTSSFTLGDSANGNVFFLGLTKDKDVRMDYTVKAPESTSSVGPSATATTGIPKSGAMKDWTVISDAWTQRGLVGVWILGIFTVNL	Melanomma pulvis-pyrius CBS 109.77
AF-A0A0C3HM44-F1-model_v3	0.003014	353	MLRKWTLPKNLSIILSLNFIFNFYLDPKPKFCRGLGIRKHLAIGEHVDELFSDRDSDSHKSVHNRSLQHELPNTSRSGRTAVPVADKLHPSMRLRQAKNQIPAGLDDDEDILKYNGWGPKNRVTTAANKATSPRTYQCDEYPPAQFNQLGNVQSALCIEWYQNSGTQAPLLSNLVNICKLQKGQKVLYRVAGGCPSIQVKREEDDNVKQSPPLRPRADSSTITLSGTNATLRNPNGDGSLTYIAVDLGALQDGHYNLGVSLGGSVDNVTVLDSDGNTYANVDAPSGTTVQFTFDVSNNGSYVPFVLIAYTENAVNVSYAGNATVVASPTATNSGVRIASGVSLIIGLIIAIVL	Oidiodendron maius Zn
AF-A0A0C3C2B2-F1-model_v3	3.467e-05	240	MALSAIIFTTIFLTINYLYSTFASPIVSNGDVFTGQSLNVTHSLAKRQWAPADQKCTTPAQWDSRVCRPTIGDRAWEDRCRGPTGGAVIRYVLSFCADENTICSNILYQNTVETIECIPRPVAQSQVPAPNQETGVAPFGSNYDLDVEHIQSVTLTNDISLASVSALLEDSGGKYLVTPFFALEGNLRGTTSKICDYNVTNRDCVPSGRYNLKKGNIIDFTFGITPGQVVRLYWAIIGGS	Piloderma croceum F 1598
AF-A0A0C3CRH5-F1-model_v3	1.354e-05	212	MSNGGAVAGELLNLTHSLANYVPADQLCDQPAQWLRRVCRTGISDRAWSDTCRTNPLTMTFEWKIGTCPVNTMCQNTFTSSPGSKEIINCVDRPYNNNVLAPDQQSGVYSVGNAGNPNPAERVVSVTVQTNLADASVSALIEGTDANYVIAANAAIVGSLRGTTAKLCNYNETNRDCVPTGQYVLTAGDTIDFTFGLDGWQVVSFYYAIIGS	Piloderma croceum F 1598
AF-M2ZV88-F1-model_v3	0.0001763	271	MLILVLLLGLSASIVSATTLQRRDYAQTDFFSAIHRNICSEVNDKQHSYHTESCECTATNALRASCRSATNELHQHIRQCSTQNRNVKCFPSENSPKTGPDCACKPEERKSGVKLPNDSNDIACTGGVHFLAAYATEVEAIDVWSDIRASPNNNVITCWVQDNRGRTLTSYAPCNYAGGVPLRIPLHGAGGQDVATYQACIQTTTNDRERVNISWVLTSPFGQTQKRDELTAGISLREAVDYDDSAATSDVQGNIVVRNGHGDEIFFPNKG	Pseudocercospora fijiensis CIRAD86
AF-A0A6S6UTQ9-F1-model_v3	2.283e-05	257	MMNKAVFIHVAMFSALADAIPARNIDSLTPAPVTANVFKRIIANDENWCQRNVHESEGIVKPTTSICNWNLDRSFSVYCAKPHGGRESWVQSFCPIGTLCEQREYVRLWNGLDGLDVECRPSANLVKWAIGSRQTGESYTKYCSNRISYKSNGGRSAIYEFYARFVGTTGLQTQVNQAYIYLNDLLIQRNVNSNQVGTTHQLGPGDIIRYCAIPGSLALLEGYATAKIKSYINADGTEEEATETNANDFKMVFHEGE	Pyrenophora teres f. maculata
AF-A0A6S6UUE5-F1-model_v3	0.0001944	246	MNPIYLLLAFVSLCYANVILNTFVEGVDITQLNAISDHKINARQSPAPRRNLGQESCLKDLRTTPNPRNRQKIILFKTNLVSATCDNDIDYTSTCQVVIPAGDNSVRSYEGKCAFTEVCTQFNYQNFLGDQTSEVACIHRDNQRQQASWSTNAQSTAKQCGPGLNTIVEETKLTLSVQFYGGSNNAIRENVRHAWIQSNKRNWLVDVEYVNGMYWEGKPILGETLQACFVRSGLLNATEAVMDWVG	Pyrenophora teres f. maculata
AF-A0A2W1H8Z1-F1-model_v3	2.834e-07	291	MLSNYWLSLLAILCFTSFTSTYAELAEWALYKDDGSHPSLPFDEKALIAVLDPAHSKRSPPVSLAESTTDPNPNFATLNRRYIGPNPNGQCPKPLYSDKEDDRRCDRRFAGPVTDQSKLYAAKSTTCASTITRRLNCQLCYGFRVDNPSEIKTTDVRCGATEVCTQESDAYNKWGNLEPESICVSGNSIIQVVAARGTAVREFCSKKFTFPKARGSVAGFHAYVYDQVTGLRVTAKWMYLKISGGYIASARNAADWETNANLGEFQFAEMCFYPFSTAEPLEMDWTVTIRN	Pyrenophora tritici-repentis
AF-B2W4K6-F1-model_v3	1.437e-07	278	MVALKLDIPALIIGSLLAIPVLSAPTANVVGHAPTVEDIIPREYIEEVRAYHEELAQIKKRAEWNHAKRALSALEKRQPAQNTCLEGETWIQRECRSDVSPRAWQDECEPANGEGFGVFRPGECPENTVCVQLSIPNGVDPGGEESFIEDILCQPSTPPRQGVRTAKRQYGYRNYKAKDKNVVAIGIEVLEDNTEASVSANVLSSDRTFVVKPITPITANLRGFNLKLCQMDPGNTQQNSPQCSPIGRPHNLRMGQFVDFTFALSAGQDSLLFYSIAG	Pyrenophora tritici-repentis Pt-1C-BFP
AF-A0A2Z6QDJ0-F1-model_v3	7.019e-12	245	MFARLCVYIFFLVAITTIAIGAPLEASSPKLITRRALLEKYGSPNRTQSRLEKYGHLSKRDYFAHCIEDDDVYVSSYCLAEHTFVINCAEPDGDAYYYTDGCEEDEYCVDYIDRFGLFHATCLNVPHYRTWTTSKNELACSLESPFDIKGNLTTGVTTYDDEGNTIDLHELQTFKSGQVVNSNFSKHNISTNFFNYNSEEIKFCFTSGFDYDLEVTAYAAGFDYDTVQGIEQGKYVPPVPVASLG	Rhizophagus clarus
AF-A0A2Z6QEA2-F1-model_v3	1.242e-10	210	MPKYCMYDSIESLTKENHNSPFPENHLVYVESVCESIHSIHTTCNTNANPPDTKFISYPCQPLETCIQFYVPSPDPNQELIPHSQCINGDKIRVWDNHDDPEADTCSYNAGYASGPTPVEIEIAFIVYDNNNLPIQVNKLVAYYKGNLLKENYSDSNNYYAIIPGYNEGETIKYCFNAGEDTRSIVTAHATAQKFYLLSDPGAAEFLDPL	Rhizophagus clarus
AF-A0A2Z6SBR5-F1-model_v3	3.951e-12	207	MVAGIPLEETRNLPLEETRSLSSNKNINDRCTDHNYPVYRSSFCKNKNTVRSVCESQDLPGTFTTSDLPCSPNFSCVDFILPNDQSPFAICISDDRRNTWDNDHNRGVICAPTRTFRLSAKTITIGMTTYDTNLNPIQVNMLDGYVNNDFLGIAFQQHNFSKTYNNYDESKGIKMCFGAGSEQEVTAVYGILIPGSTINELTIVSSE	Rhizophagus clarus
AF-A0A2Z6SMB1-F1-model_v3	1.012e-11	203	MLVLGVPLNNETSMIPLNPLQKRLTIPVCPGHHPVYVESECESMYSILITCETDANPPDTDFISYPCRPRETCIQFYVDSPDPDEPPIPHAQCIANEYCREWDNNHRDPLDYACSTSGGYNTGQDPTDLEVAFITYDRNNLPIQVYSMIIYYKDDAIVDYTDVNNISVTIPSYEQGEKIEYCFEAGTENVVTAYGAAQRYSNL	Rhizophagus clarus
AF-A0A2I1GZC0-F1-model_v3	0.009784	475	MEQPVNNKHKIDFLISDNTPSTQPTRNPRNRYKKCNECNRKRKIYDKSHEICHVCYKIKTILKPKQSGNKVIDDFIRYTQSNYAIIEGGKMEFIPYDQFINIEFIAEGGFSKIYKATWVDGPINNWDRIINNHWNITRNNNYTVVLKKLNNSKNITSKELNELQVFYQIYSDRFADYSYIGKYFGITQDPITKDIMIIMPYYNSAKIIHRDLHSGNIFFDVYKLPYIGDLGISKSATECTEDSNENYGIIPYMAPEIFQGQKYTEASDIYSYGMIMWEFMAGRTVVGIPVENLQNQIFSTNSIIPTRPKCTDPIYTKYKSSVCATRKSVRVSCESYDLPGTVVDTNFSCKEGESCIDITSNDAFCVDENSGLAREWENNHVDGRVCSAPVLLVPPDKSY…	Rhizophagus irregularis
AF-A0A2I1GYL6-F1-model_v3	0.0002909	445	MFAKLCIYAFFLITITTITIGAPLALLEVSSKLTSRPAQLEKYGPLNQQSLSRRGHLNTFAQCSHEEDTVLESYCDKLRTIIVRCIMPDGTIYGTTQQCENFGICVDYNNYYSIKSAVCASKPYIKTFFVIKNELTCSSSTPYDLGADLHTGMTTYNVDSEDPVTVYELQTLYKDQVVETKFSKHVITKNLPDYKNNEKVQYCFIPGTNDSLLVGAAVAVGYDKSNKAPLLGIGAPLEVSSKLTSRPAQLEKYGPLNQQSLSRRGHLNAFAQCSHEEDTLLDSYCDKLRTMNVRCIMPDNTIYNITQQCEGFGICVDYNYNSVKSAICASIPYIRTFYSMKNELTCSSNTPYASEGDLYTGMTTYNVNSEDPVTVYELQTLYKDEVVEAKASEHFITKS…	Rhizophagus irregularis
AF-A0A2I1EVM9-F1-model_v3	1.798e-11	328	MFAKLCIYAFFLIAITTITIGAFLEVSSKLTSHHAQLEKYGPPNQQSLSRRGHLNKRLQFVECKDGNDVLLDSYCNKLRKIIVHCQHPDGKLITFNKSCKKEEVCIDYNDANGNHQALCIENLYVRTWTSIDYNKLSCSSDTAYIQGGDLHTGVNTYYDDDEYPAEVYQLQTFLSEQMVENNFYKHNITKEFHDYRNTERIKYCFTPGSNLKITAYAVAINFDPKAGNDKGTPRITLQSYNKEFYFEFFNHVYLQVILTNNTHINDISTLRKKGRVGVIGLEIIGDLIIDGVAGLSNFLEFMATFEEEVEDASCDDDDELSSPNLLTL	Rhizophagus irregularis
AF-A0A2N1N5R1-F1-model_v3	1.004e-09	273	MSYPGIHIFAGAVRSEAQLINFGAAVLPKMGFRVWFLFLLKETSFEVRTWIAFQNFLKLQQEVVIHNNIIRLYGIMKDESVVGIPVVNLQDQIFSIDGSAVPTRPKCTDPNNAKYKSSTCATRKSVRVSCESFSQPGTPVDTNFSCGDGDSCVNITPNDAFCVDDSSAQVWDNKNENKVVCSAPVSLVPPHVSFQLVAGITTYSTTGDPIRVAELQAKYDDNNSNIYTDYKYQENNYTFPIKQEDFSTKLSFCFYPGSNEEVQAVGSLAYVLM	Rhizophagus irregularis
AF-A0A2I1H1B1-F1-model_v3	5.589e-06	266	MTVPGEPVTILLSQFFNVYKRKQKGKGKQKCYRSNTIIENKFSKFLSKNNSSGYQSFNYIKKFLDRKFHIAVVGIPVVNLQNQTFSIDGSAVSTRPKCTDPNNAKYKSSTCATRKSVRVTCESFSQPGTPVDTNFSCGDGDSCVNITPNDAFCVDDNSAQVWDSKNKNKVICSAPVLLVPPHKSFQLVAGMTTYANSGDPIRVAELEARYSNEHSRIPFAPDHINQDNKYTFPIKQEYYSNDMYFCFYPGSNVEVQAVGSLAYVLM	Rhizophagus irregularis
AF-A0A2I1HNZ5-F1-model_v3	1.713e-12	224	MFAKLCIYAFSLIAITSRRAQLEKYETLNQQSLSRRGHLNKRFQLVECLDGNDVLIDSYCDKLRKIIVHCQHPDGKLITFNKSCKKDEVCIDYNDANENHQSVCMEKLYIRTWTSIEYNKLSCSSDTAYIQGGDLHTGVNTYDEDENPVEVYELQTFLSEQVVESNFYKHNITKDFHDYRNTERIKYCFTPGSNLKITAYAVAINFDPRAGNDKGTPVLVASSE	Rhizophagus irregularis
AF-A0A2N0NZS3-F1-model_v3	2.317e-09	213	MFAQLYIIYIFFLVSAVVGVPVENLQNQTSSTVSLLGKVIPTKPTCTDPIYRKYKSSACVTRKTVRVSCESYDLPGTVVDTNFYCADGESCIDMTSNDAICVNENINSVREWENNHVDGRVCSEPVLLVKPPTKYFHLVAGITAYSTTGDPIQVQTLETRYDDNPSANEYTEQTNNYSFTIKKENFSHYMIFCFVAGTSEEVQAVGALGYVFL	Rhizophagus irregularis
AF-A0A2N0NZR1-F1-model_v3	4.132e-10	208	MFAQLYIIYIFFFLVSAVVGIPVENFQNQTFSTNSIIPTRPKCTDPIYTKYKSSVCVTRKSVRVSCESYDLPGTVVDTNFSCGEGESCIDITSNDAFCVDENSGLAQEWENNHVDGRVCSAPVLLVPPDKSFKLVAGITAYSTTGDPIQVQSLSAKYDDKDSDDYTEQKNKFSFNIKQENFSHYIKFCFAAGTQEEVQAVASLGYVLL	Rhizophagus irregularis
AF-A0A2N0QZM7-F1-model_v3	5.653e-10	208	MFAQLYIIYIFFLVSAVVGIPVVNLQDQIFSIDGSAVPTRPKCTDPNNAKYKSSTCATRKSVRVTCESFSQPGTPVDTNFSCGDGDSCVNITPNDAFCVDDSSAQVWDNKNQNLAVCSAPVTLVPPHVSFQLVAGMTTYSTTGDPIRVAELAARYGEGQSSRFESVYQGNEYTFSIKQEDFSNKLSFCFYPGSNEEVQAVASLAYVLM	Rhizophagus irregularis
AF-A0A2N1ML56-F1-model_v3	0.0004257	194	MKTHINDFNSITNMFAQLYIIYFFFLVSAVVGIPVVNLQNKTFSTDSPVPTRPKCTDPNNAKYKSSACATRKSVRVSCTAVDTNFSCGDGESCVNITSNDAFCVDDNSAQEWENNHDPEKLVAGITTYSTTGDPIVVAELIARYDDKNSDYAYQKNNYTFTIKQENFSKNMNFCFIAHSSEEVQAVASLAYVLM	Rhizophagus irregularis
AF-A0A2I1FAN7-F1-model_v3	3.922e-10	189	MVVGVPLEESTKNGTLVSKRATPTVCKDHNHSELVNSWCNTKSSVTVICANKDFPGTFTSDTIQCNSDEVCVDYFATEKSAQAQCAVSYKRWDNANSITPCSSTASYRGGTPIDIALGATTYDVNGNPIQVAQFAIYLNNHEIATTFNRHNVSTILRDYKNDNDDSFESCFSFSGTARVTGYFAAFGAV	Rhizophagus irregularis
AF-A0A2I1HAI0-F1-model_v3	0.003085	188	MVVGVPLEESTKNGTLISKRTTYPACNDNNYSELVNSWCAMKSSMTVICANKDFPGTFTSDTILCNGGEVCIDYFPTENNAQAECASWYLTWDNQNSKIPCSSSSSFGGGATIDISVGATTYDVDGNPIQVAQFAIYLNNQEIVTTSNLHNVSTILHDYNSVEDGKFESCFAFSGTERVTGYFAAFGG	Rhizophagus irregularis
AF-A0A2I1HA40-F1-model_v3	0.001727	186	ASLEVSSKLTSHHAQLEKYGPPNQQSLSRRGHLNKRLQFVECKDGNDEEVCIDYNDANGNHQALCIENIYIRTWTSIDNNKLSCSSDTAYIQGGDLHTGVNTYYDDDEHPAEVYQLQTFLSEQMVENNFYKHNITKELHDYRNTERIKYCFTPGSNLKITAYAVAINFDPKAGNDKGTPVLIASSG	Rhizophagus irregularis
AF-A0A2I1HA98-F1-model_v3	6.472e-05	185	MTVLCSNVNTENPGNVGNRADRLTEQECHINEHCVDFTLSNAVPFAICVPERKLLAWTNGNRNREFCSGTIELSEDDDGGQVTIGLTTYATNGLPIQVFGMVGKVNDVQVGKVSNRHNYSQIIDYKAHDLVRFCFTPGISNPNDETFANEADALGYIAILSQIEKVAHGAQVTEVTDIETVISQN	Rhizophagus irregularis
AF-A0A2N1NJP1-F1-model_v3	0.0002048	180	MRILFAQLCKLYTVFFVVNATILVLGAPLNNGTSMIPLTPLQKRLTIPVCSNYHPIYVESECREWDNNYSDPSELTCSVNDGYVSGPTPVDIEVAFIVYAHDNIPIQVNSLVAFYKDNKIANYIDQNNLTAKISGYKQGERIKYCFNAGSDNIVTAYGAAQKLSLLSDPGYAEFLDIEPL	Rhizophagus irregularis
AF-A0A2I1FF51-F1-model_v3	7.677e-08	171	MTVQCKNGNNVMASHQQQCNPSEKCIDFVLNDEVPFAMCVPRSKLLSWTNGNHNDKVCSGTIRFDSGATSETITIGFNTYDTNGNPIQVFDVVGRVNNQQIGEVENQHNYSQIINNYKLHDIVSFCFMPGISDPNDPAFANEVIAYAYIVRLSSIGKVAQFTDIEPVISLN	Rhizophagus irregularis
AF-A0A2I1HK30-F1-model_v3	0.005586	165	PKCTDPNNAKYKSSTCATRKSVRVSCEPYNNPGTAVDTNFSCGDGESCVNITSNDAFCVDDNSAQEWGNNHDPDKVCSAPVLLAPPHESFQLVAGMTTYSTTGDPIKVFELIAIYDDNNFDHAYQQNNHTFTIKQESFSKNMNFCFLAHSSEEVQAVASLAYVLM	Rhizophagus irregularis
AF-A0A2P4QK00-F1-model_v3	0.0005246	230	MSSMTVICANEELPSTFTSNTIQCNRDEVCVDYFDTENSAQAQCAVSYTKWDNKYLLFPCSSGTSYGGEDIAVGATTYDVEPIQVDQFGIYLNDQEIAITTNLHNVSTIVRGYKNGDGNFSSCFKFRVITDTHPIIKLNQVHVNAVTQGYVPRNIDIERSPKNILVSSFLGGRSHLKPILDVATVLIERPQHDDDYRVLVHLMRLATEAYNVTYEKFKNATKENNIDLFI	Rhizophagus irregularis DAOM 181602=DAOM 197198
AF-U9UFX3-F1-model_v3	3.365e-11	221	MRIFSAQLFKLYALFLVAIATVALGVPLVRRKGSHGSLICSEQNALTKRADIPFEERCPEEYSLYIASLCSIDAPNLMLINCAREDEPDVIFDTDYTCEDDEICIDRTEFPETPHAFCIKKKCGLPFDNFVRPDLDACGSHSYSVSGPVNLVVAMMTYSTEMNPIQVNYQNVKYKGDLAFVNQVNNFTRVINGYNGENIDFCFNGGTTQKVQAFAAAWITD	Rhizophagus irregularis DAOM 181602=DAOM 197198
AF-A0A2P4NZD8-F1-model_v3	1.448e-09	202	MFAKLCIFFLIAITTMVVGVPLEESTKNGTLISKRTTAPVCKDHNYSELVNAWCATKSSMTVICANEDLPGTFTSDTIQCNGAEVCVDYFLTENNAQAQCASLYMKWDNKDGLISCSGTSLYGNGKTFDISVGVTTYDVDGNPIQVDQIAIYLNNQEIATTSNLHNVSTILQDYEDGVFESCFAFRGTARVTGYFAAFGATA	Rhizophagus irregularis DAOM 181602=DAOM 197198
AF-A0A2H5RYS3-F1-model_v3	1.256e-13	181	MVEGQATIETTVPQCPAGTTYVASLCFSVGRIQVFCQNPQNPTLEIIAFTDCEPDEVCIEHEHAINEDLNRPHATCVSSEFYTVWDNFNNPDADACAQEVYKHDHGALDVEIAMTIYAHDGRPIQVNLLRALSNDHELSRIFDMHNYTQVIRGYNGETIKYCFNTGTKNQVTAYAGSWIIN	Rhizophagus irregularis DAOM 181602=DAOM 197198
AF-A0A372RUP6-F1-model_v3	3.043e-12	231	MRTFTAQFFKICTFFLVVIITTTAGVSISSISKRETVGRCPDRNYPQFVNSMCKSVNSMIVQCTDPNNPNVRTSYEQQCNPGENCVDLLLSDEVPFAMCIPTKKLLSWTNGNYNNQACSGTIRYTSGPSGESVSIGINTYDTNGNPIQVYDVVSRVNNKQIGEVKNQHNYSSIIKQYNVNDIVTFCFLPGISDPNHPDYANEAIAYAYIIRTKLIGGAVQVTDVEPVILQN	Rhizophagus sp. MUCL 43196
AF-A0A372QLP9-F1-model_v3	4.146e-05	159	MVFCENSQDPADDRVEYVDCGPDETCIEHYHAVESDLDVAHATCINNENRVRKWDNFDAPAKKSCSAERGYDTESNDLEIAVTIYANDEKPIQVNTIIAYKNGVEISTVYDQHNYTSVIRNYNDEKIQYCFTTGTYNTVRAYAAGWDIENKTFLLDSKS	Rhizophagus sp. MUCL 43196
AF-A0A372RNI2-F1-model_v3	7.232e-06	158	MFAQLYIIYIFFFLVSAVVGIPVEKLQNQTFSTNSESCIDITSNDAFCVDENSGLAQEWENNHVDGRVCSAPVLLVPPDKSSKLVAGITAYSTTGDPIQVQSLSAKYDDKDSDDYTEQKNKFSFNIKQENFSHYIKFCFAAGTQEEVQAVASLGYLLL	Rhizophagus sp. MUCL 43196
AF-A0A372Q9U4-F1-model_v3	0.004469	157	MHFVIITITAGVSISKRETVAKCQDPSYTYFEGSWCKTLTSMNVLCSNAKNGNVRVRKLSEQSCNPDEHCVDFLLNDEVQNAMCVPYQSTIGFTTYGTNGQPIQVYKAYGNVNYQAQSLRKIQDMLMKADANAYIVLLSTIGKGAQVEDIEPVILQN	Rhizophagus sp. MUCL 43196
AF-A0A1E1L9R0-F1-model_v3	0.0002158	208	MPSFERYKDLVLSQISSQKYLTLQQHLQISCCPIFIISNLSGLLPEDQAIIEIELVLITAILGAICNAGPLAHRQEATQNWPAHTLSYIDSAPEGIESLNANVTNLVPRVTHPDFDYPLGPDDLSWSREGCTTTDVLSGGRRHIGTVTYDAQDNPINVLFIKYVGEPGDKIEGVAGSTSSFSSPSFLFDIRSYMKVTLFALLAGASGL	Rhynchosporium agropyri
AF-N1QDB0-F1-model_v3	8.028e-06	393	MHVANLVTICALLPSIVECAGGQVASHFDSAVFYNVCKEKNGGYGPGRVTWRTQQAMCVSEYRFKALCRRTAPNPQENHQEWYERDCSDNPKFQVFCFPSSINSEKKPDNACRDLFQGQGSKPPRDTDGVACSSGLKFDETLTTWSTIVFTDEGAASDVQGCWTQHSGESSKRLNTHYPCEHDSNVLTFEAGKTYQTCIEANDDSPKRINWIWRVTSPFGHKKRDVTAPYKSFLDSVQINRTMASDLDAQIVIEDEALFDSVGSFVSSFTRQYTPIICDQHATKRDSATDIHLFNAIKQIGDRKSYAVAKRCIDAAMHSTVAFDVTNIHDTAYTQFGNMLILSVIYNSPYLGTLVSKDKFKKLLERTIGFLHCEILETLNNILFGVGEDIKPR	Sphaerulina musiva SO2202
AF-U7Q485-F1-model_v2.pdb.gz	0.00151	224	MKSFLPLLSLAGAASALHLYIDASKPKCFFEELPKDTLVVGHYSAEEWDDRIQTWSKHDGISIYISVDETFDNDHRVVSQRGSSSGKFTFTSAEAGEHKICFTPTSNSGRPGWQSATGHEGHKGHVGIKLELDLAIGESSKLESTDKNKLEDLESRVRDLNNRLSDIRREQVFQREREADFRDQSESTNARVVRWIFIQLIVLGVTCAWQLSHLRSFFIKQKLT	Sporothrix schenckii ATCC 58251
AF-A0A6G1L8D5-F1-model_v3	0.0001492	269	MLRNQWIKSLGMVTQVCLTYAQIINADFFSAINVNVCQEMNGGSGFGRVTFDTNSCDCTGPKTFKARCRRTRPNPREGYIQEYSRDCDPRDPSVLCFPTEDARRNDDCSCVQIDKKIGSKPPHTTTGVACSNPLNAKWDVNIKAIDVYSTIVTTKPQRSEIQGCYTETTRGRRLNNHYPCGSAADNGNVLAFANGDDYHACIETNDDTPDRINFEWVIQSPWGHLKRDDGSNYDLRDLLHIDRTADSKKYRGSVVLLDHLGEELDRYDP	Teratosphaeria nubilosa
AF-A0A6G1L6B4-F1-model_v3	1.162e-06	266	MHPFSAFSGPILSLLLVLVDQSSITAVAFKVGEPFLSAKTENLCGKLYDGGYGFGRTTWETIAAHCEDRAEMSLRCTSVLPTKGEERESVYECKSDQVCVTTDGADAISPDAGCISVPTREGLVAADDQDRRACSAGFTVGPSGLHGVRSQIRPAIPELDDTIESCSVIRSGTNEIASTSKDCDEFSQQELNLLPGTYQACLTVQQALNRVATAFYWILILRNGIKKRDDFGMEEVLPLSELVTIEKRAEPQEGPSVEIQLVDERA	Teratosphaeria nubilosa
AF-A0A6G1KWT6-F1-model_v3	6.539e-07	259	MKYILSNDQDTAYSAGNHLDFKRAAPEELATVQREDGGLDIVLNSSLPESDAPAQKREERDRTHMLSKRTATPEQVCSELSWRGCELRPESAQCIGQDEYQVYCTGCFRYPEPERVHQKVAKNVCPPRTHCFTVAGINYWQEPVPQVLCFPVGQTMQWTATTKKLEDTTTCSPGLTNKSGRELKIEATVRSLESTGQSEVMAQRVAVVLDGKALDGLDMAREFRTDLVLRHASSVQGCITTQGKFNQVIEGMLGLWFLG	Teratosphaeria nubilosa
AF-A0A1B5L624-F1-model_v3	2.472e-12	277	MLSSPAAKLCAVLLAGLAGLADAVTGSASDNAAVSVPVPVPVHVPVHQDTASPEAQIFANLTFEEFQLKVDELRQGKVKKRLPHGGELLNSAVANDLLEALHHICGMHMLEPIGWHALESRCLRQESTGGSLLKTRRRSIACGKPQDSRLQRHDIISTCPRGQICEEFLAFNWRREGSTFTYCGFEVPVDHRKSDGTRAKFTGEWHIGQNPLNNIYINEEGQGHVSFDFSGHDSSGSRVRRVENANSWACMGCSPGVLKITHFDSPTFAVGFVEAAL	Ustilaginoidea virens
AF-A0A063BYW4-F1-model_v3	1.142e-10	273	MTARFCQYLSNSNMLPPPSLLVLAFAGLAHSIYAASSTPRGAVNSEPFHRPESISNLSFEEFLAKVSRINKATSPARYRRQDGDVVLGEVHNNPEGNEMLREFHKECRKFRGYRAMSGVCAGKSLMRRSIYCGKPGDSSAKRKATSLYCPEGKKCGLRYAFNYHENYVQWPVCVDTVKVDRPTRRTDPIPGFSADYFASVPGSFDGVPQSPGTRYFHFQMDSYVKNGEAAPYGFFTDTAGHSGWGLTWSCFHCPPGLVKIHSRERALAYAYVD	Ustilaginoidea virens
AF-A0A063C2C3-F1-model_v3	1.666e-10	258	MLPLLFLLCTTSFPGLAHSTDPAPISPRRGDLIRHSEVRTDLTIDEFLAEVSRRKKQTSPSLPLYKRAPLGQESRNNLEVNAVIEELHRVCRSITDSHRSTGGKCRWEFGSGWEQQGENREPKTTREIHCQIPEQAGSQRSALRRCPQGQVCRIRRGYNYAGDWVEFPFCEDEIPFLRDKDNFVAVYSVSKPGPGGAQAVSYHVDIDWPATNAPGRNAFFEDTSGKKGWARSWSCFFCPPGLVTIHSHLPAVAFGHVV	Ustilaginoidea virens
AF-A0A1B5L8M4-F1-model_v3	2.813e-05	256	MFPLLLLLCAAAFLGLAHGKPAPITPRPAAKSNSFRRPEFRDNLTLEEFLAEVSRRRAMTSSALYRRDVVGDESRNSDAVNAALQDLHLFCQGFQGGTHAVGGSCYSSFKTKTRVKCELPVIGDTGAKSRFGQCPQGKVCNTMSAYNFRGIYSNFPTCVEVAKVDRKEQKTDANPNPGYSGEYYASGRPSSPGTGYYHFQMASYDATGDLAPYGYFTSPGGHHGLARTWSCFDCPFGLVKIHCQVRAIAYAYVLSV	Ustilaginoidea virens
AF-A0A1B5L457-F1-model_v3	0.0001845	253	MKVLRLAPIGLACLAYATPPAASDGGISPLGRAVPSDPEPQIFINLSTEEFLQKRKELRESQTTGLQRRHLYGLEVANGHFEQARMETLHEICCRKIGESGYHAYGASCLRNLMNLSCGRPEGPLRDRKATEMCPQGQVCREFQSWNFRNNRATFTHCVEKINVKHRQFNDPNGVKYIGEYQLSGMKLEDLMVAMEEHAVADFDFSGSSSSAGQQHKHNAHSWACFGCRYGTLKITHWNSPAVAFASTAFVDF	Ustilaginoidea virens
AF-A0A063BV31-F1-model_v3	6.293e-14	251	MDRMAVTPRDALAAHGHGASDGHHARSVADLTFDEFLAEATRRRKLRSAALQKRSGVLGESRNSDEVNALLQEYHDFCRRKRAGTRSIGGQCSGNNKRMKRINCAIPVDGTMGNKWTYAEHCGEGQVCTARALMAYNFVRTNNRKVQWPTCVDEVHVDQPAEEPADEPAGSSEAGYSGYYWAGDNIQSPGTRDYILAQASNLAGGGYGRTHFHDTAGNKGWAWKTWSCFSCPPGRVEIFAHKPGSVYGFVF	Ustilaginoidea virens
AF-A0A063BWV6-F1-model_v3	2.609e-12	251	MRLLVLFAAALSSPSLALDTLERLDTDSWTPAARGAALSGGLGHPRVFANLTLDEFFDKLSLAREEASSQNHKRQPVTSEHDQMCQEAMQSSSWRASWGACTNSDHSRRVYCKTIIRGADGRLPRERSVQKVCPVNKKCYRVLTRNSMGNMVHLPLCLDQLIIDKMEKGTLEEHLWYLFYKEYFAWNTEAPTLGYTTSYHVQMGEGQGSGLFTDTNGHRSRATSWSCIDCPPGRTKIETQTKSFAYAYVSS	Ustilaginoidea virens
AF-A0A063C7H3-F1-model_v3	1.856e-10	221	MTKPESRSGLTFEQFLQEVSRRRKRTSPRIHKRQFEGEINNSAAVNLQLLPFHQACHAKHPGSRSIGGNCIKNAARRRAVNCRNPAHAQISVVYKPCAEGEVCNADMLFAYNFNARKVKWPLCVQAAKVAKKEARTDPNQGGEYAGEFYASRPEDPAQSDLDYHLNLDLTLYTGPSPSSYGRFRDTAGHTGSGSSWSCFSCPPGLVTIHAEKPSIAYGYVM	Ustilaginoidea virens
AF-A0A517LM24-F1-model_v3	1.668e-05	298	MKAKSWYFDIWPNKRFLKGTSQQNRKQAKSFVAPWISHHHRTNDCSAGFHADKMKVSSAWALLLGLVSLPTHSYEFTSARDFNLCNALYAGGYGYGRVTFTTLSASCINTKKMTLRCYFLIGPWRPRPNSEYTCVGDQWCIPPNPSQFFPDAGCITILQPKGLKRGGDSDNYACSSGLNIGDNPLYLLSSISTDNPIYSDANTMTECTVIRSGTTQHLYIDSPCTKQSTLIELAARTSYQACIQLADTLRDVAVSFTWHLSAPGKLARDLEGKRLSAEMFSIDNSTSSSGNFRVVVDL	Venturia effusa
AF-A0A517KZF0-F1-model_v3	0.0005824	284	MDLAIPWWYHRYRKIANYRDRQDWAPRQHDKMKVSIAWSLLLPLVPPLAYGHTFPSARDYNICGHLYNIIIPNGEIKFTTITAACTGTTKMGLQCLHHESGLGYFKYGEYQCQEHDYCLPTTWKTMLGSDVKADAGCIPLKDPIGMKLSGDADDYACSSGFIVGDDPIYVKSVISTDHAVYLPYMQECTIIQSGTSKHIFSRAPCEQQSVLLQLNAKTTYQACVQMSYKLAAFAIGFTWHLRPPGIQARDLHHSKPLSEMFTIDNSTSTTSKVRFDIVIGDSEL	Venturia effusa
AF-A0A517L9M3-F1-model_v3	0.0005246	253	MDLFSTLALLSAIFSLTTHVYGHTFASATEYNICGKLYDVGYGPGRVAFSTREAKCKDEVTMNMDCRYISRLGQSTKKDGEYTCEGEDKCFPSRWDFLGEIVNDAGCLNPPKALGGTKGQAATANHACSAGLNVGDEQIYIQSSITVDNPKYEDLLQSCKIIQDNPAPKPDRIIVNYPTCDDRSHILLLKPKTTYQACIDLAVRAAVFSVGFTWHISSPGNILSRRDSTKPLSEMFTINNSTSDNAVKIVVDL	Venturia effusa
AF-A0A4Z1PC84-F1-model_v3	5.846e-05	298	MKISSIISLILPLVGVSLATGDFTFLSAMDFNICGKLGNINYGWGIVRMYTLAAVCLNDHTMAINCGYIVPNVPTLRPGFYHCGGEHLCLNVGGEDDLADAGCVFLGKPAGVKGDGDTDNYACSAGINVGAKPIWVTSAIYADNEKYQSGVDYCTVIKTSDKTHLTKGCEKKSKILKLAAHTAYQACIHTISALATANVAFHWHLGSTGKYPARRLHGRSLDGGQHSPGDGQHFSEDGQHFSEDGQHFSEDGQHFSEDGQHLSEDGQLLSEDGQPLSELFTIDHSAATSDAVKIVVKD	Venturia nashicola
AF-A0A4Z1NIP0-F1-model_v3	9.894e-06	291	MREHPLRLNFQVTSYLLVLLNSTTLIIQGISLTMLTHNALSLLLTLVSLSTSVNASLKQFNSAIGVNLCGKIRNHGFGAQRTEFITISAMCTDTTHMRLRCQYVSPFFGPQVNVDFFCYGQTRCIATNNSGKDLAQNPDAGCNKIRKPSGVKGEGDSDNYACSSGLNVGDQDIYLLSSISADNSLNQANALLSCALQRSGDGNYKLFVHKPCEKASSVIKLLAKKTYQACISTTEAFRGQKVPFHWNVDSAGNLPYTLHMRDVVDKRPLSEMFTIDDSIGDDFPIVVRERE	Venturia nashicola
AF-A0A4Z1P5L0-F1-model_v3	1.758e-05	269	MKVSSVFSFILPLVSLYALASPLASQETSPNPRAVLNRRYEQTFISAINYNICQKEWGGGEGGPGYVRMGTILAICHGLKVMRLNCRYYSPFEHINTHDYTCGELLVCMPTTQPGQNPDAGCVAISQPTGVLEEGDMDNFACSTGINIGERPLTVLSSITTDGKTNNAAISRCSILKSGTQQYLWDHAPCESESFIVHLAARTSYQACISAAVGYIHHRVGFKWHVLPPGKLINRDTEDEKDETPFSELFTIDKTQKRGPVDFELVVGE	Venturia nashicola
AF-A0A4Z1NVU0-F1-model_v3	1.758e-05	248	MIAYSALPLLLTLASLSTRSFAKRHTFPSAKLYNICGKLNDGGSGFGRVIFRTISAYCVDDQRMAMKCRWSNHANPLDLPAIYDCQKPDQCVNVAKALGTENPDAGCQNPPQLSGVKGAADIDNHACSSGINTGDASIVLLSSITPDDPAVKLDGCSIIQSGTQNKLFSHRPCEKSSTIITLKAKTTYQACIDTAATLAGISIGFHWHLHSTGKIRGRGLDDGRPLSEMLTIDESTSNPAFPIVIHDD	Venturia nashicola
AlphaFold Structure Database Identifier	Score	Protein length	Protein sequence	Species
AF-A0A6A6GUU2-F1-model_v3	0.000266	265	MKLSSAYLAIPLLIASPLTALATANSQLFTRNGSGIVSDGITAALEYQPAPNSQKRNPILRDVRGLTKRQDQYYIDQCPQQGAEVPPGYTEWRGSRCVTETWAGPWRNSCNPSNPAPLNALFWFNGACRAQEWCVNEPWNPNFQFSGQYPRAGCVTHALMQRIVQAAAAHARRVVRLTPQNPQPDSNLAIALSGENDDSVLFQAESITLIARNKNFVRLGQQISCQDCSTLTFSQFPAGTDNLKAEIVLPNKNDVAYLSAYSWYS	Viridothelium virens
AF-A0A6A6H6C8-F1-model_v3	0.0001751	261	MKLLAICLVLPFFTAMRSAALSTPNGNGSFSSGYKITLDYKPAPSSRRHDAASTNLGLMRRQMSYPINQCPQQASGTYRDFTDFRGSRCLTDTHSGAWEISCNPPIGQTPPFGIPFYWYDGSCRPHEICIDRPVDPSQMIPHGQYSTAWCVAGSAMVTLSQAALANDVRRVQATPQDRWSMNENIEIILTGQNDDDILFKAHEITLGARDTNKNPVGQPISCSECSNLRFSNWPQGTANFDSNITLPNVNDIANLHMVSWS	Viridothelium virens
AF-A0A6A6HH12-F1-model_v3	3.493e-07	250	MAVPFDVLSANHSSQVVHGNNDSLSIVLDHQAVSDDRRRDAAMLDFLTKREASYPVNQCPLQAPSAPASFTQFKGSECLTKTFAGTYTISCDYPVWRGPPHGVGLFWYQGACRPHEICIDRIYDQGITWFTGVYSTAWCVAGTSFVSLARTVIGNANRRVTIVPQKRKGKNASIGVVLTREDDNDVLFKAYMMTLIARDAEHRRLGQTISCSNCSNLSFRKWPIGTVDFGLDVVVPNTSDIANVHVFGWP	Viridothelium virens
AF-A0A6A6HNK3-F1-model_v3	3.506e-08	210	MPDYQPIYNVSSPKKRYDTPQQFEHLKRQLPHAIECPLPDMDPRYRHTVWAKCRGDDPRAYSVMCQAFPLDARYYQFSIGHCDNDDLCLDLPPAGSVCLPAASALTIRKAQKDYDTAKYTSHVVTTGAAHANFALVLRGQDDDQTVFQSSEISLVPRDKNNNNLQNAITCQECSELRFNDFPKNTENFGMNIILPHAGDIARLQTYGWYG	Viridothelium virens
