# Supplementary material for: The structural repertoire of Fusarium oxysporum f. sp. lycopersici effectors revealed by experimental and computational studies
Source: eLife. 2024 Feb 27;12:RP89280. doi: 10.7554/eLife.89280 (PMC10942635; doi:10.7554/eLife.89280)
Supplement: Supplementary file 3. [file elife-89280-supp3.docx]

**S3 Table.** Amino acid sequence inputs for AlphaFold2

| **Name** | **Sequence** |
| --- | --- |
| SIX196-284 | EPFGEESRNDRVTQDMLQALHDLCVERFGTGYRAVSGLCYTDRRATRKIECNKPSVRERDRSVTRACPKGQECTTFNAYNFRNRHHQVTFPVCGPRIEVKDRHDIGIHTEWQGTWYPESPKSPGTYDYFAQMAGTLNGYFGYDGVYSDGYKTSSHGYGHSWSCINCPRGKVTITNTYRATWAFGYTSPH |
| SIX298-221 | GSCFSFPTPARGSCMIDYCWRDDNGVIYSRGITITGSNGASNPTSMRSNDPANLSLNSVFNDGYNGWFPHGHACSNSDTQIYTNHRLLQGVNGVAYVDHVRCENCNFRNVNCLSDVLKNNLIAYSNGVASQSRCT |
| SIX336-163 | LPVEDADSSVGQLQGRGNPYCVFPGRPTSSTSFTTSFSTEPLGYARMLHRDPPYERAGNSGLNHRIYERSRVGGLRTVIDVAPPDGHQAIANYEIEVRRIPVATPNAAGDCFHTARLSTGSRGPATISWDADASYTYYLTISED |
| SIX459-242 | SAHTESVCVHAGTATGADLHWLNAICTGKSTYTVNCAPAGNKNAGSTHTGTCPAGQDCFQLEQVGNFWGDREPDATCSPSNTVFDAVDDKEATHVNGKVVTRAGKPGIGRKLIRLKAQVYRRDGHYGQTSRMGFFRNGKEVYHIDNVASMEPTWNFDPSSDQSFSFFFTPGPNAFRIQGTLNLA |
| SIX518-119 | RDHQYCACQSGSGDSIDIDATTQLQNDNSKSYLWAQTSPAYWFADRHKPGPRFAGIYLKAANGKIDGDTFYNLCINNGGADSTCFDCSKSHQVRNVIYCDAA |
| SIX658-225 | DTLPVSTCPAGQKYDRSVCYKADKIRSFCVANPRSNREKITDTPCQPREICVQRNLSNGKSFAKCIPIVDLVEWKTSANGNKEGCTTTSVNPAGYHHLGTIVYDINKNPIEVDKISYFGEPGNVNEGIGGSTSYFSSDNFQFSKSRYMKTCIFSGGYGNLNAYTWSWE |
| SIX749-220 | EVTFDITQNVNTFTSAASTPWTEGVGLSNIRYQWRAYYSTRQRTTFVEVRVFGTAEAQVVLLPDAPGTSRYRAIDSNVFRPNEEVTGGGLAGWGQVTTVCLQTWGRRGDITYRLRIQS |
| SIX850-141 | DTSGILLACITGAGSAFQAYAGCYLTAFRNDPRTLTLRMDKTRGERISNVLVILSGGALSHAVEEVVQIAPGAVRNLATLGASTVQFLHNFR |
| SIX919-114 | QTTQVGCRALDTKNDGLLTELLLNPSARGAADPDLRYGFWDAKWRKCCNKYKECDKYYTFSYNHPYPWAYRQRRGTIRGQQFDFACVNWRTGACK |
| SIX1015-149 | IPDSGVSTGTKDLSKRDDAYIFDVTFRVGPAGANVAPFSGSVYVQDGLTPLVRSGSGSSISDRGYNAFRGIVYFTFTHGYNQYSASTRFGVYVDTGLIVDSNGRPIYGTAPRKACIDYSPHGPTDVCSVTITRSK |
| SIX1119-110 | INICCSSFAGHTCTKDQYNNHRQNVILNQIIDKDGVNCVRKGAGPGRWTRKGDWSEWYDCQQWNGPEQHQIEVGECTLFCVTPSGILNRPCI |
| SIX1227-127 | SSCLSVGPKGISNQNACVCGGQCVMKDLVVARRKVCCEYTVQIQGGWPVLAQSRCVYGSTGANGGSCSGDNVSLAWWLNYEPEVKSTDPTCIFAKPKLCHS |
| SIX1378-293 | QDDEHPNGPCPRGGRLYVDSDEDSSCNAKWGTQTHNDVKTFGSTGSVCAGTFRRITCACCYTMHPITDNNVPRMDGIYCPKWEVCKQEPERWSKWGNRVSHTSCVQAKKLTEILIATKKVVKEYCTPKRWLPSAGKGKNAKFHTWAYNYSTGQLTTLKWMYLKLDGQYVKSAPGISEWGLTYSVNEHNAIELCGYPSDDMQRNSIDAELQWEATVQ |
| SIX1418-88 | QRILGCRMPNGSLNPSPNICNQAGGSFRSGSRGCCTRNTRDGPVVTESRFISGCNKNGGFVSSKEILATSC |
| PSL118-111 (FOXGR_025399) | EDWDRCRCMKYPETGTPNDCATIKACGSGKHRAISISEEKGDIWCEKTDVAISGPEFYRTCYGLLQDPKPNSEADSCCTRWVDGVVVQSDGCFK |
| FOXG_1103324-226 | APEAAPGYTTYGDYKGAGENLPSYPSYGSYGAKPKPKPKPAPAPKKYTNYGSYNYKKYSSYGHYKREAEPEAAPEAAPEAAPEAEAAPGYTTYGDYKGAGENLPSYPSYGSYGSKPKPKPKPAPAPKKYTNYGSYNYKKYSSYGHYKREAEPEAAPEAEAEPETYSKYGSYPKKYTHYGSYNYKKYSSYGTYKRAKEFINSLF |
| FOXG_0575556-157 | NGVPDPGNFAASCHGLQVISDDLDLTGKPDFERCNDTAYEARQYFSGEYTTVEVRRTDYPDLGKEVQISATANYTSTNDNIVNGHLKFGDFQTKFISTPIEG |
| FOXG_1869921-96 | CKRTCSASNDAGTTCSYSCTQVCSSISAKQARDTFLAALQSGGNSCSAVGTSGVSCRKTAKFGSCYDHHWSCGSGC |
| FOXG_04863106-300 | MYDSSDDKGGLSDITRNAWSKFCNSPYGNNGGVTTRFILDGQWGAVGRLSGWSMRDALIHSMWQTADGIGKKNGYTVYNGCYGFTWQESKPGKANSACGGRSGKACPYNDDCPLAGMECTGLKWGTWMPSIIRMNVYNRDGSLRADAYQARISSQAVGSGGCSKAQTISAYVADFIPIVGPYFATGIRINCLYQS |
| FOXG_0480539-132 | QNGQNGGRPVPSGECCVANTSLKQDACTASNGQAGRCVPGGNNCGGRLSCVAQANLQCDANVIERGKDLCRAKAANGLFDGGNIIQNLSQAKVN |
| FOXG_0282918-149 | APSSPSDIQARSCVCKKVGDDWICTGTKCYDKVKRDLVPRQCSCHKIGDEWLCGGPKCPRDLPEENKLAKRQCSCHKVGDEWLCGGPKCPRSLPAEESGLEKRQCSCKKVAGEWICSGRKCPRDLSHLMGEE |
| FOXG_1660017-164 | SPISKRAVFSQTTYDDLSISGGTAGNAQQEALQKLGGLPTDLSTVEKSDLDFLNSVNQIANDAEDEAFNPAIDAASGEAADALQRGKIKNKVLKLTATILKLQAQQAQGEDVADKLAEENKKLQNNISQDKDEAGKASTFLAFDATTS |
| FOXG_1468438-168 | DGTCPRPMCTTPASQGPKDPPACGDSYAACKFDQFPCDEYFSPKVTDTHHCYCILANKKAMDAYCQERGFKSGTNPWKYYYAVECHGAVSNQVCNKDCRDQGRGKGRIDKAHPNGACACDKPNPPYDTCKP |
| FOXGR_00732318-86 * | SLVRRVDVNVPAMTNADGVVVPFDTAGVVQPAKKRDLEQKKRDLAQRKRHISRKRRAVSQEKQKQQQKQ |
| FOXGR_02563918-61 * | APVVRGPGGRLVQEGAGCTLVQGRSVCDDGFGNTFFEDDPFSSK |
| PSL218-106 * (FOXGR_015322) | EDWDQCRCMKYPSTGTPNDCATIKACGSGKHRAISIYKNGDIWCEKTDVAINGPEFYRTCYDLLQDPKPNSEADSCCIKGDRASDGCFK |
| FOXGR_01553319-114 * | QTCAIAPDPQRNADAFSATSHSGNIDIAFRDHVVFARPSAGTATGVLRLSNGDSYRKIYRIAGPNNVAQFYWLDASSQCKTNLAITQMTNAAWYKE |
| FOXGR_01552219-79 * (SIX15) | TIYCRDVSPPRDTRSWCKTNTPAWQGCQRFCSEHCRSTPRDYPDGCMYHLQVGGDYDCFCK |
| * Effector candidates identified in the reannotation of the *Fol* genome by Sun et al. (2022) and not predicted in the original genome annotation by Ma et al. (2010). | |
